# Supplementary material for: Detailed mechanism and kinetics of reactions of anti- and syn-CH3CHOO with HC(O)OH: infrared spectra of conformers of hydroperoxyethyl formate
Source: Royal Society of Chemistry journal article supplement (doi:10.1039/d3cp04086k), 2023-12-13
Supplement: d3cp04086k1.pdf [file d3cp04086k1.pdf]

## Electronic Supplementary Information

### Detailed mechanism and kinetics of reactions of *anti*- and *syn*-CH<sub>3</sub>CHOO with HC(O)OH: Infrared spectra of conformers of hydroperoxyethyl formate

Bedabyas Behera<sup>a</sup> and Yuan-Pern Lee<sup>\*ab</sup>

<sup>a</sup>*Department of Applied Chemistry and Institute of Molecular Science, National Yang Ming Chiao Tung University, 1001, Ta-Hsueh Road, Hsinchu 300093, Taiwan.*

<sup>b</sup>*Center for Emergent Functional Matter Science, National Yang Ming Chiao Tung University, Hsinchu 300093, Taiwan*

Emails: [bedabyas88@gmail.com](mailto:bedabyas88@gmail.com) (BB); [yplee@nycu.edu.tw](mailto:yplee@nycu.edu.tw) (YPL)

## Table of Contents

|                                                                                                                                                                                                                                                                                                           |     |
|-----------------------------------------------------------------------------------------------------------------------------------------------------------------------------------------------------------------------------------------------------------------------------------------------------------|-----|
| <b>Section SA</b> Reaction mechanism and error analysis of the rate coefficient $k_1$ for $\text{CH}_3\text{CHOO} + \text{HC}(\text{O})\text{OH}$ -----                                                                                                                                                   | S1  |
| <b>Table S1</b> Cartesian coordinates of optimized geometries of six conformers of hydroperoxyethyl formate (HPEF) predicted with the B3LYP/aug-cc-pVTZ method--                                                                                                                                          | S3  |
| <b>Table S2</b> Cartesian coordinates of optimized geometries of four conformers of hydroxylated secondary ozonide (HSOZ) predicted with the B3LYP/aug-cc-pVTZ method-----                                                                                                                                | S4  |
| <b>Table S3</b> Cartesian coordinates of optimized geometries of four pre-reaction complexes of $\text{CH}_3\text{CHOO}$ and $\text{HC}(\text{O})\text{OH}$ predicted with the B3LYP/aug-cc-pVTZ method-----                                                                                              | S5  |
| <b>Table S4</b> Cartesian coordinates of optimized geometries of $\text{C}_2\text{H}_5\text{OOH}$ , $\text{C}_2\text{H}_3\text{OOH-1}$ , and $\text{C}_2\text{H}_3\text{OOH-2}$ predicted with the B3LYP/aug-cc-pVTZ method-----                                                                          | S6  |
| <b>Table S5</b> Cartesian coordinates of optimized geometries of four conformers of formic acetic anhydride (FAA) and two conformers of formic acid anhydride (FAN) predicted with the B3LYP/aug-cc-pVTZ method-----                                                                                      | S7  |
| <b>Table S6</b> Harmonic, anharmonic, and scaled harmonic vibrational wavenumbers ( $\text{cm}^{-1}$ ) and IR intensities ( $\text{km mol}^{-1}$ , listed parenthetically) of conformers P1 and P2 of hydroperoxyethyl formate (HPEF) predicted with the B3LYP/aug-cc-pVTZ method-----                    | S8  |
| <b>Table S7</b> Harmonic, anharmonic, and scaled harmonic vibrational wavenumbers ( $\text{cm}^{-1}$ ) and IR intensities ( $\text{km mol}^{-1}$ , listed parenthetically) of conformer P3 of hydroperoxyethyl formate (HPEF) predicted with the B3LYP/aug-cc-pVTZ method-----                            | S9  |
| <b>Table S8</b> Harmonic, anharmonic, and scaled harmonic vibrational wavenumbers ( $\text{cm}^{-1}$ ) and IR intensities ( $\text{km mol}^{-1}$ , listed parenthetically) of conformers Q1 and Q2 of hydroxylated secondary ozonide (HSOZ) predicted with the B3LYP/aug-cc-pVTZ method-----              | S10 |
| <b>Table S9</b> Harmonic, anharmonic, and scaled harmonic vibrational wavenumbers ( $\text{cm}^{-1}$ ) and IR intensities ( $\text{km mol}^{-1}$ , listed parenthetically) of conformers P1* and P2* of hydroperoxyethyl formate (HPEF) predicted with the B3LYP/aug-cc-pVTZ method-----                  | S11 |
| <b>Table S10</b> Harmonic, anharmonic, and scaled harmonic vibrational wavenumbers ( $\text{cm}^{-1}$ ) and IR intensities ( $\text{km mol}^{-1}$ , listed parenthetically) of conformer P3* of hydroperoxyethyl formate (HPEF) predicted with the B3LYP/aug-cc-pVTZ method-----                          | S12 |
| <b>Table S11</b> Harmonic, anharmonic, and scaled harmonic vibrational wavenumbers ( $\text{cm}^{-1}$ ) and IR intensities ( $\text{km mol}^{-1}$ , listed parenthetically) of conformers Q1* and Q2* of hydroxylated secondary ozonide (HSOZ) predicted with the B3LYP/aug-cc-pVTZ method-----           | S13 |
| <b>Table S12</b> Harmonic, anharmonic, and scaled harmonic vibrational wavenumbers ( $\text{cm}^{-1}$ ) and IR intensities ( $\text{km mol}^{-1}$ , listed parenthetically) of $\text{C}_2\text{H}_5\text{OOH}$ predicted with the B3LYP/aug-cc-pVTZ method-----                                          | S14 |
| <b>Table S13</b> Harmonic, anharmonic, and scaled harmonic vibrational wavenumbers ( $\text{cm}^{-1}$ ) and IR intensities ( $\text{km mol}^{-1}$ , listed parenthetically) of $\text{C}_2\text{H}_3\text{OOH-1}$ and $\text{C}_2\text{H}_3\text{OOH-2}$ predicted with the B3LYP/aug-cc-pVTZ method----- | S15 |

|                                                                                                                                                                                                                                                                                                     |     |
|-----------------------------------------------------------------------------------------------------------------------------------------------------------------------------------------------------------------------------------------------------------------------------------------------------|-----|
| <b>Table S14</b> Rotational parameters of the ground state and vibrationally excited states ( $\nu = 1$ ) and ratios of <i>a</i> -, <i>b</i> -, and <i>c</i> -types of conformers P1 and P2 of HPEF predicted with the B3LYP/aug-cc-pVTZ method-----                                                | S16 |
| <b>Table S15</b> Rotational parameters of the ground state and vibrationally excited states ( $\nu = 1$ ) and ratios of <i>a</i> -, <i>b</i> -, and <i>c</i> -types of the conformer P3 of HPEF predicted with the B3LYP/aug-cc-pVTZ method-----                                                    | S17 |
| <b>Table S16</b> Rotational parameters of the ground state and vibrationally excited states ( $\nu = 1$ ) and ratios of <i>a</i> -, <i>b</i> -, and <i>c</i> -types of conformers Q1 and Q2 of HSOZ predicted with the B3LYP/aug-cc-pVTZ method-----                                                | S18 |
| <b>Table S17</b> Rotational parameters of the ground state and vibrationally excited states ( $\nu = 1$ ) and ratios of <i>a</i> -, <i>b</i> -, and <i>c</i> -types of conformers P1* and P2* of HPEF predicted with the B3LYP/aug-cc-pVTZ method-----                                              | S19 |
| <b>Table S18</b> Rotational parameters of the ground state and vibrationally excited states ( $\nu = 1$ ) and ratios of <i>a</i> -, <i>b</i> -, and <i>c</i> -types of the conformer P3* of HPEF predicted with the B3LYP/aug-cc-pVTZ method-----                                                   | S20 |
| <b>Table S19</b> Rotational parameters of the ground state and vibrationally excited states ( $\nu = 1$ ) and ratios of <i>a</i> -, <i>b</i> -, and <i>c</i> -types of conformers Q1* and Q2* of HSOZ predicted with the B3LYP/aug-cc-pVTZ method-----                                              | S21 |
| <b>Table S20</b> Rotational parameters of the ground state and vibrationally excited states ( $\nu = 1$ ) and ratios of <i>a</i> -, <i>b</i> -, and <i>c</i> -types of C <sub>2</sub> H <sub>5</sub> OOH predicted with the B3LYP/aug-cc-pVTZ method-----                                           | S22 |
| <b>Table S21</b> Rotational parameters of the ground state and vibrationally excited states ( $\nu = 1$ ) and ratios of <i>a</i> -, <i>b</i> -, and <i>c</i> -types of C <sub>2</sub> H <sub>3</sub> OOH-1 and C <sub>2</sub> H <sub>3</sub> OOH-2 predicted with the B3LYP/aug-cc-pVTZ method----- | S23 |
| <b>Table S22</b> Comparison of experimentally observed vibrational wavenumbers and relative IR intensities of FAA (F1) with literature values-----                                                                                                                                                  | S24 |
| <b>Table S23</b> Experimental conditions and first-order rate coefficients $k^I$ and $k^I$ of the reaction CH <sub>3</sub> CHOO + HC(O)OH in four sets of experiments-----                                                                                                                          | S25 |
| <b>Table S24</b> The kinetic model employed in fitting the temporal profiles of bands A <sub>6</sub> and A <sub>7</sub> in the reaction CH <sub>3</sub> CHOO + HC(O)OH-----                                                                                                                         | S26 |
| <b>Fig. S1</b> Geometries of species observed in this work-----                                                                                                                                                                                                                                     | S27 |
| <b>Fig. S2</b> Geometries of possible conformers of hydroperoxyethyl formate (HPEF) in the reaction of CH <sub>3</sub> CHOO + HC(O)OH-----                                                                                                                                                          | S28 |
| <b>Fig. S3</b> Potential-energy curve calculated as a function of the COCO dihedral angle for the interconversion among conformers of HPEF (P1–P3) produced from <i>anti</i> -CH <sub>3</sub> CHOO + HC(O)OH-----                                                                                   | S29 |
| <b>Fig. S4</b> Potential-energy curve calculated as a function of the COCO dihedral angle for the interconversion among conformers of HPEF (P1*–P3*) produced from <i>syn</i> -CH <sub>3</sub> CHOO + HC(O)OH-----                                                                                  | S30 |
| <b>Fig. S5</b> Potential-energy curves calculated for the interconversion of HPEF conformers between P2*/P3* and P2-----                                                                                                                                                                            | S31 |
| <b>Fig. S6</b> Geometries of possible conformers of hydroxylated secondary ozonide (HSOZ) produced in the reaction of CH <sub>3</sub> CHOO + HC(O)OH-----                                                                                                                                           | S32 |
| <b>Fig. S7</b> Geometries of pre-reactive complexes and products other than dehydrated products in the reaction of CH <sub>3</sub> CHOO + HC(O)OH-----                                                                                                                                              | S33 |
| <b>Fig. S8</b> Geometries of conformers of formic acetic anhydride (FAA) and formic                                                                                                                                                                                                                 |     |

|                                                                                                                                                                                                                                                                                                                                                                     |     |
|---------------------------------------------------------------------------------------------------------------------------------------------------------------------------------------------------------------------------------------------------------------------------------------------------------------------------------------------------------------------|-----|
| anhydride (FAN) produced in the reaction of $\text{CH}_3\text{CHOO} + \text{HC(O)OH}$ -----                                                                                                                                                                                                                                                                         | S34 |
| <b>Fig. S9</b> Geometries of transition states in the reaction of <i>anti</i> - $\text{CH}_3\text{CHOO} + \text{HC(O)OH}$ -                                                                                                                                                                                                                                         | S35 |
| <b>Fig. S10</b> Geometries of transition states in the reaction of <i>syn</i> - $\text{CH}_3\text{CHOO} + \text{HC(O)OH}$ -                                                                                                                                                                                                                                         | S36 |
| <b>Fig. S11</b> Linear fit of experimental wavenumbers vs. calculated harmonic vibrational wavenumbers of hydroperoxymethyl formate (HPMF)-----                                                                                                                                                                                                                     | S37 |
| <b>Fig. S12</b> Observed spectra in region $770\text{--}1950\text{ cm}^{-1}$ during photolysis at 308 nm (5 Hz, 180 mJ pulse <sup>-1</sup> ) of a flowing mixture of $\text{CH}_3\text{CHI}_2/\text{O}_2/\text{HC(O)OH}$ (0.064/53.9/0.020, $P_T = 54$ torr) recorded with continuous scan -----                                                                    | S38 |
| <b>Fig. S13</b> Comparison of temporal evolution of bands $A_6$ and $A_7$ -----                                                                                                                                                                                                                                                                                     | S39 |
| <b>Fig. S14</b> Comparison of the observed spectra in groups C, D, and E with simulated IR spectra of conformers of HPEF -----                                                                                                                                                                                                                                      | S40 |
| <b>Fig. S15</b> Comparison of the observed spectra in groups C, D, and E with simulated IR spectra of conformers of HSOZ (Q1, Q2, Q1*, and Q2*), $\text{C}_2\text{H}_5\text{OOH}$ , $\text{C}_2\text{H}_3\text{OOH-1}$ , and $\text{C}_2\text{H}_3\text{OOH-2}$ according to anharmonic vibrational wavenumbers -----                                               | S41 |
| <b>Fig. S16</b> Comparison of bands $A_{12}$ and $A_{13}$ observed in region $3200\text{--}3900\text{ cm}^{-1}$ with simulated IR spectra of possible conformers of HPEF ( $P_1\text{--}P_3$ , $P_1^*\text{--}P_3^*$ ), HSOZ (Q1–Q2, Q1*–Q2*), $\text{C}_2\text{H}_5\text{OOH}$ , $\text{C}_2\text{H}_3\text{OOH-1}$ , and $\text{C}_2\text{H}_3\text{OOH-2}$ ----- | S42 |
| <b>Fig. S17</b> Exponential fit of the decay of $P_2^*/P_3^*$ -----                                                                                                                                                                                                                                                                                                 | S43 |
| <b>Fig. S18</b> Fitted first-order rate coefficients $k_1^I$ ( $A_6$ ) and $k_1^I$ ( $A_7$ ) as a function of $[\text{HC(O)OH}]_0$ .-----                                                                                                                                                                                                                           | S44 |
| <b>Fig. S19</b> Temporal profiles for the decay of $\text{CH}_2\text{CHI}$ due to pumping-----                                                                                                                                                                                                                                                                      | S45 |

## A. Section SA Reaction mechanism and error analysis of the rate coefficient $k_1$ for

### $\text{CH}_3\text{CHOO} + \text{HC(O)OH}$

The kinetic model, shown in Table S24 (ESI<sup>†</sup>), considered only the important reactions including the branching of the formation reaction of  $\text{CH}_3\text{CHI} + \text{O}_2$ , the self-reaction of  $\text{CH}_3\text{CHOO}$ , the reaction of  $\text{CH}_3\text{CHIOO} + \text{CH}_3\text{CHOO}$ , the main reaction of interest  $\text{CH}_3\text{CHOO} + \text{HC(O)OH}$  to form HPEF, and the conversion of HPEF to FAA. Other reactions such as reactions of  $\text{CH}_3\text{CHOO}$  with I or IO, wall loss, unimolecular decay of  $\text{CH}_3\text{CHOO}$ , and diffusion loss, which have rate coefficients much less than  $1000 \text{ s}^{-1}$ , are not included in the model because we are considering a reaction period less than  $40 \mu\text{s}$ . Even for the conversion of HPEF to FAA, reaction 7 in Table S24 (ESI<sup>†</sup>), with a rate coefficient of  $\sim 1420 \text{ s}^{-1}$ , it has negligible effect on the rise of HPEF except in a few experiments with very small  $[\text{HC(O)OH}]_0$ , which has an effective pseudo-first-order rate coefficient of  $\sim 10^5 \text{ s}^{-1}$ . The small error in this rate coefficient,  $70 \text{ s}^{-1}$  in fitting and perhaps  $200 \text{ s}^{-1}$  after error analysis, hence has an even smaller effect.

The total rate coefficient of  $\text{CH}_3\text{CHI} + \text{O}_2$ ,  $8.6 \times 10^{-12} \text{ cm}^3 \text{ molecule}^{-1} \text{ s}^{-1}$ , was taken from Howes et al.;<sup>1</sup> a value of  $8.0 \times 10^{-12} \text{ cm}^3 \text{ molecule}^{-1} \text{ s}^{-1}$  was reported by Sheps et al.<sup>2</sup> For the branching involving the formation reaction  $\text{CH}_3\text{CHI} + \text{O}_2 \rightarrow \text{CH}_3\text{CHOO}$  and  $\text{CH}_3\text{CHIOO}$ , reactions 1–3 in Table S24 (ESI<sup>†</sup>), estimated yields of  $\text{CH}_3\text{CHOO}$  are  $\sim 71$  and  $64 \%$  at 40 and 80 Torr and those of  $\text{CH}_3\text{CHIOO}$  are  $\sim 8$  and  $15 \%$  at 40 and 80 Torr, respectively, according to our unpublished work; about  $21 \%$  proceeds to fragmentation and formation of other products. The production of  $\text{CH}_3\text{CHIOO}$  reduces the concentration of  $\text{CH}_3\text{CHOO}$ . When we assumed the concentration of  $\text{CH}_3\text{CHOO}$  to be  $[\text{CH}_3\text{CHI}]_0$ , that is, no branching in the formation reaction, the resultant first-order rate coefficient  $k_1^I$  decreased by  $\sim 7 \%$  and  $1 \%$  at the smallest and the largest  $[\text{HC(O)OH}]_0$  in this work. The effect of the yield of  $\text{CH}_3\text{CHOO}$  is small because

the main reaction  $\text{CH}_3\text{CHOO} + \text{HC(O)OH}$  is very rapid, other reactions have limited effect on the main reaction.

Because the presence of  $\text{CH}_3\text{CHIOO}$ , we also included the reaction  $\text{CH}_3\text{CHOO} + \text{CH}_3\text{CHIOO}$ , reaction 5 in Table S24 (ESI†), even though the rate coefficient has not been reported. When we included this reaction and assumed a rate coefficient of  $1 \times 10^{-10} \text{ cm}^3 \text{ molecule}^{-1} \text{ s}^{-1}$  for this reaction, the fitted first-order rate coefficient  $k_1^I$  decreased by  $\sim 3\%$  at the smallest  $[\text{HC(O)OH}]_0$  and remained nearly the same at larger  $[\text{HC(O)OH}]_0$ .

Rate coefficients for reactions involving I are also unknown. However, because the system has a significant amount of  $\text{HC(O)OH}$  and its reaction with  $\text{CH}_3\text{CHOO}$  is rapid, I atoms with concentration less than 25 % of  $\text{HC(O)OH}$  in most cases will not be able to compete with  $\text{HC(O)OH}$  efficiently. If we include the reactions  $\text{CH}_3\text{CHOO} + \text{I}$  using a rate coefficient similar to that of  $\text{CH}_2\text{OO} + \text{I}$  ( $9.0 \times 10^{-12} \text{ cm}^3 \text{ molecule}^{-1} \text{ s}^{-1}$ )<sup>3</sup> and  $\text{CH}_3\text{CHIOO} + \text{I}$  using a rate coefficient similar to that of  $\text{CH}_2\text{IOO} + \text{I}$  ( $3.5 \times 10^{-11} \text{ cm}^3 \text{ molecule}^{-1} \text{ s}^{-1}$ )<sup>4</sup> in the model, the fitted first order rate coefficient  $k_1^I$  decreased by 3 and 0 % at the smallest and largest  $[\text{HC(O)OH}]_0$  employed in this work. We hence did not include these reactions in our model.

Considering the errors in the estimation of  $[\text{CH}_3\text{CHI}]_0$  (error  $< 30\%$  transforms into error  $< 7\%$  in  $k_1^I$ ), error resulting from uncertainties in the rate coefficient of the self-reaction of  $\text{CH}_3\text{CHOO}$  ( $k_{\text{self}}$  in Table S24, error 25 % transforms into error  $\sim 3\%$  in  $k_1^I$ ), error due to uncertainties in other reactions ( $\sim 10\%$ ), and the fitting error ( $\sim 15\%$ ), the error in  $k_1^I$  is estimated to be  $\sim 20\%$ . When we combine the fitting error in Fig. 12 ( $\sim 20\%$ ) and the error in the absolute concentration of  $\text{HC(O)OH}$  (20 %), we estimated the overall uncertainty to be  $\sim 35\%$ . A rate coefficient for reaction  $\text{CH}_3\text{CHOO} + \text{HC(O)OH}$  at 298 K is hence reported to be  $k_1 = (2.1 \pm 0.7) \times 10^{-10} \text{ cm}^3 \text{ molecule}^{-1} \text{ s}^{-1}$ .

**Table S1** Cartesian coordinates of optimized geometries of six conformers of hydroperoxyethyl formate (HPEF) predicted with the B3LYP/aug-cc-pVTZ method

|     | <i>x</i>   | <i>y</i> | <i>z</i> |     | <i>x</i>   | <i>y</i> | <i>z</i> |
|-----|------------|----------|----------|-----|------------|----------|----------|
|     | HPEF (P1)  |          |          |     | HPEF (P2)  |          |          |
| O1  | 0.24707    | 1.97363  | -0.13302 | O1  | 1.95862    | -1.21100 | -0.36298 |
| O2  | -0.61652   | 1.00822  | 0.51422  | O2  | 1.67065    | 0.12561  | 0.11659  |
| C3  | -0.78647   | -0.11145 | -0.28648 | C3  | 0.34693    | 0.42677  | -0.19009 |
| H4  | -0.55502   | 0.13546  | -1.32111 | H4  | 0.10024    | 0.10774  | -1.20016 |
| C5  | -2.18156   | -0.65098 | -0.08336 | C5  | 0.16186    | 1.91011  | 0.03037  |
| H6  | -2.36381   | -0.81959 | 0.97699  | H6  | 0.42166    | 2.17466  | 1.05419  |
| H7  | -2.90284   | 0.07303  | -0.45629 | H7  | 0.79766    | 2.46594  | -0.65622 |
| H8  | -2.30238   | -1.59128 | -0.61716 | H8  | -0.87678   | 2.17347  | -0.15828 |
| O9  | 0.11325    | -1.22057 | 0.10929  | O9  | -2.24717   | -0.32474 | -0.69224 |
| C10 | 1.43027    | -1.06266 | 0.10104  | C10 | -1.72310   | -0.65875 | 0.33443  |
| H11 | 1.91418    | -2.01073 | 0.36135  | H11 | -2.19859   | -1.27965 | 1.10404  |
| O12 | 2.04738    | -0.05360 | -0.14378 | O12 | -0.48402   | -0.33789 | 0.73338  |
| H13 | 1.10697    | 1.50228  | -0.10470 | H13 | 1.85697    | -1.72673 | 0.45018  |
|     | HPEF (P3)  |          |          |     | HPEF (P1*) |          |          |
| O1  | -2.09872   | -0.95222 | -0.04812 | O1  | 0.96886    | 1.56536  | 0.18855  |
| O2  | -1.18301   | 0.02008  | -0.61657 | O2  | 0.94308    | 0.59944  | -0.88873 |
| C3  | -0.45550   | 0.59620  | 0.42492  | C3  | 0.67639    | -0.68236 | -0.44080 |
| H4  | -1.11145   | 0.76809  | 1.27570  | O4  | -1.59959   | 0.84619  | 0.50291  |
| C5  | 0.14834    | 1.88313  | -0.10010 | C5  | -1.72113   | -0.24498 | -0.00350 |
| H6  | 0.69416    | 1.71392  | -1.02285 | H6  | -2.69383   | -0.73445 | -0.12794 |
| H7  | -0.65260   | 2.59859  | -0.27785 | O7  | -0.77297   | -1.02917 | -0.49307 |
| H8  | 0.82473    | 2.29390  | 0.64787  | H8  | 0.00991    | 1.62788  | 0.39231  |
| O9  | 1.80340    | -0.52627 | -0.89310 | H9  | 1.06059    | -1.31610 | -1.23822 |
| C10 | 1.55030    | -0.78557 | 0.24845  | C10 | 1.23741    | -1.06383 | 0.90937  |
| H11 | 2.14445    | -1.46333 | 0.87643  | H11 | 2.30346    | -0.84379 | 0.92564  |
| O12 | 0.52143    | -0.32831 | 0.98488  | H12 | 0.75961    | -0.51062 | 1.71241  |
| H13 | -1.70294   | -1.77992 | -0.35556 | H13 | 1.08927    | -2.13034 | 1.06813  |
|     | HPEF (P2*) |          |          |     | HPEF (P3*) |          |          |
| O1  | -1.97867   | -1.04911 | 0.30033  | O1  | 2.28764    | -0.59264 | -0.29344 |
| O2  | -1.00413   | -0.72550 | -0.72649 | O2  | 1.37478    | -0.37879 | 0.81498  |
| C3  | -0.28683   | 0.41928  | -0.35503 | C3  | 0.25081    | 0.31958  | 0.37387  |
| O4  | 2.39217    | -0.20251 | -0.61247 | O4  | -2.48631   | 0.12869  | 0.41687  |
| C5  | 1.87751    | -0.20635 | 0.46893  | C5  | -1.85650   | -0.58350 | -0.31539 |
| H6  | 2.39417    | -0.45514 | 1.40406  | H6  | -2.29412   | -1.34022 | -0.97776 |
| O7  | 0.59619    | 0.10194  | 0.75153  | O7  | -0.52408   | -0.58669 | -0.46478 |
| H8  | -1.52500   | -1.76829 | 0.76182  | H8  | 2.05193    | -1.49564 | -0.55036 |
| H9  | 0.31991    | 0.60716  | -1.23978 | H9  | -0.30660   | 0.49345  | 1.29379  |
| C10 | -1.12934   | 1.60617  | 0.04574  | C10 | 0.53012    | 1.60091  | -0.37534 |
| H11 | -1.83996   | 1.82894  | -0.74854 | H11 | 1.15588    | 2.24845  | 0.23725  |
| H12 | -1.67411   | 1.40162  | 0.96332  | H12 | 1.03992    | 1.39586  | -1.31277 |
| H13 | -0.48755   | 2.47253  | 0.19801  | H13 | -0.40985   | 2.11154  | -0.57809 |

**Table S2** Cartesian coordinates of optimized geometries of four conformers of hydroxylated secondary ozonide (HSOZ) predicted with the B3LYP/aug-cc-pVTZ method

|     | <i>x</i>   | <i>y</i> | <i>z</i> |     | <i>x</i>   | <i>y</i> | <i>z</i> |
|-----|------------|----------|----------|-----|------------|----------|----------|
|     | HSOZ (Q1)  |          |          |     | HSOZ (Q2)  |          |          |
| O1  | -0.83647   | 1.20299  | -0.15638 | O1  | -0.78202   | 1.15715  | -0.05975 |
| O2  | 0.46132    | 1.06545  | 0.49615  | O2  | 0.65697    | 1.19125  | 0.08789  |
| C3  | 1.06115    | 0.11898  | -0.36618 | C3  | 0.99946    | -0.09636 | -0.39764 |
| H4  | -1.40999   | -0.83969 | 1.37404  | H4  | -2.11951   | -0.58064 | -1.14721 |
| O5  | -1.95574   | -0.73647 | 0.58432  | O5  | -2.27305   | -0.55934 | -0.19345 |
| C6  | -1.20042   | -0.15542 | -0.40617 | C6  | -1.12889   | -0.14695 | 0.43242  |
| O7  | 0.02386    | -0.83150 | -0.58835 | O7  | 0.00547    | -0.94467 | 0.16896  |
| H8  | -1.80975   | -0.14232 | -1.30856 | H8  | -1.33355   | -0.13075 | 1.50232  |
| H9  | 1.31263    | 0.60282  | -1.31625 | H9  | 0.90437    | -0.10637 | -1.48943 |
| C10 | 2.25651    | -0.50456 | 0.30306  | C10 | 2.38288    | -0.46589 | 0.06374  |
| H11 | 2.67114    | -1.27245 | -0.34795 | H11 | 2.62268    | -1.46955 | -0.28386 |
| H12 | 3.02020    | 0.25166  | 0.47874  | H12 | 3.11112    | 0.22914  | -0.35260 |
| H13 | 1.96862    | -0.95788 | 1.24977  | H13 | 2.43522    | -0.44174 | 1.15042  |
|     | HSOZ (Q1*) |          |          |     | HSOZ (Q2*) |          |          |
| O1  | 0.43822    | 1.02942  | 0.61098  | O1  | -0.53061   | 0.99923  | -0.59299 |
| O2  | -0.38922   | 1.08390  | -0.59294 | O2  | 0.71725    | 1.27662  | 0.08678  |
| C3  | -1.00091   | -0.19843 | -0.54787 | C3  | 1.12894    | -0.03551 | 0.48419  |
| H4  | 2.04840    | -0.03526 | -1.12116 | H4  | -1.15371   | 0.09235  | 0.31916  |
| O5  | 2.22059    | -0.27286 | -0.20139 | O5  | -0.08697   | -0.70316 | 0.79991  |
| C6  | 1.03452    | -0.25443 | 0.49639  | C6  | 1.71153    | 0.11361  | 1.39556  |
| O7  | 0.04782    | -1.05963 | -0.11133 | O7  | 1.91363    | -0.76813 | -0.58064 |
| H8  | 1.25367    | -0.58246 | 1.51080  | H8  | 2.12161    | -1.78559 | -0.25003 |
| H9  | -1.24249   | -0.43827 | -1.58494 | H9  | 1.34947    | -0.80527 | -1.51117 |
| C10 | -2.21114   | -0.26814 | 0.35620  | C10 | 2.85992    | -0.25783 | -0.75906 |
| H11 | -2.58260   | -1.29193 | 0.39065  | H11 | -2.10694   | -0.62979 | -0.33541 |
| H12 | -1.95235   | 0.04923  | 1.36452  | H12 | -1.67685   | -1.16920 | -1.01208 |
| H13 | -2.99875   | 0.37802  | -0.03079 | H13 | -1.64073   | 0.62881  | 1.13421  |



**Table S3** Cartesian coordinates of optimized geometries of four pre-reaction complexes of CH<sub>3</sub>CHOO and HC(O)OH predicted with the B3LYP/aug-cc-pVTZ method

|     | x        | y        | z        |     | x        | y        | z        |
|-----|----------|----------|----------|-----|----------|----------|----------|
|     | C2       |          |          |     | C3       |          |          |
| O1  | 0.20222  | 1.77183  | -0.18902 | O1  | -0.10237 | 1.70945  | 0.08039  |
| O2  | 1.11389  | 0.90437  | 0.38971  | O2  | -1.19081 | 0.94234  | -0.30245 |
| C3  | 1.56384  | -0.02459 | -0.31905 | C3  | -1.49579 | -0.03374 | 0.41998  |
| H4  | -2.55176 | -0.76943 | 1.22953  | H4  | 2.77685  | -0.62183 | 1.08271  |
| O5  | -2.69404 | -0.08068 | 0.56186  | O5  | 2.78213  | -0.02048 | 0.32220  |
| C6  | -1.77642 | -0.24293 | -0.40023 | C6  | 1.71503  | -0.30535 | -0.43598 |
| O7  | -0.96310 | -1.13481 | -0.41889 | O7  | 0.93635  | -1.19910 | -0.20582 |
| H8  | -1.88659 | 0.52366  | -1.16750 | H8  | 1.67431  | 0.35832  | -1.30024 |
| H9  | 1.23633  | -0.06430 | -1.35150 | H9  | -0.91572 | -0.18195 | 1.32368  |
| C10 | 2.50000  | -0.99892 | 0.27284  | C10 | -2.60369 | -0.91757 | 0.01206  |
| H11 | 2.06850  | -1.99984 | 0.19300  | H11 | -2.21202 | -1.92692 | -0.13955 |
| H12 | 3.43655  | -1.00834 | -0.29037 | H12 | -3.34975 | -0.97846 | 0.80792  |
| H13 | 2.70069  | -0.76889 | 1.31617  | H13 | -3.06936 | -0.56697 | -0.90548 |
|     | C2*      |          |          |     | C4*      |          |          |
| O1  | 0.98550  | 1.31637  | -0.57236 | O1  | 0.57542  | -1.43643 | 0.38441  |
| O2  | 1.86642  | 0.95453  | 0.42229  | O2  | 1.06613  | -0.78657 | -0.75135 |
| C3  | 2.21173  | -0.25604 | 0.48293  | C3  | 1.63524  | 0.31483  | -0.56353 |
| H4  | -1.87647 | 0.02919  | -0.00508 | H4  | -2.08198 | 0.49334  | -0.03827 |
| O5  | -1.61744 | -1.13354 | 0.17816  | O5  | -1.17581 | 1.26362  | -0.27862 |
| C6  | 2.90288  | -0.44754 | 1.29624  | C6  | 1.96235  | 0.76986  | -1.49276 |
| O7  | 1.71969  | -1.27571 | -0.44314 | O7  | 1.86301  | 0.90539  | 0.75591  |
| H8  | 0.64007  | -1.40805 | -0.29003 | H8  | 0.89414  | 1.21315  | 1.15838  |
| H9  | 1.82629  | -0.91106 | -1.46826 | H9  | 2.24954  | 0.13988  | 1.43171  |
| C10 | 2.23780  | -2.21947 | -0.29760 | C10 | 2.52780  | 1.76174  | 0.68908  |
| H11 | -3.11886 | 0.53630  | 0.03934  | H11 | -1.96616 | -0.77888 | 0.27532  |
| H12 | -3.73014 | -0.19095 | 0.23693  | H12 | -0.99142 | -1.05789 | 0.31115  |
| H13 | -1.13152 | 0.80313  | -0.22502 | H13 | -3.13667 | 0.79795  | -0.06035 |

**Table S4** Cartesian coordinates of optimized geometries of C<sub>2</sub>H<sub>5</sub>OOH, C<sub>2</sub>H<sub>3</sub>OOH-1, and C<sub>2</sub>H<sub>3</sub>OOH-2 predicted with the B3LYP/aug-cc-pVTZ method

|     | <i>x</i>                            | <i>y</i> | <i>z</i> |    | <i>x</i>                            | <i>y</i> | <i>z</i> |
|-----|-------------------------------------|----------|----------|----|-------------------------------------|----------|----------|
|     | C <sub>2</sub> H <sub>5</sub> OOH   |          |          |    | C <sub>2</sub> H <sub>3</sub> OOH-1 |          |          |
| O1  | -1.81571                            | 0.10850  | -0.09439 | O1 | 1.70085                             | 0.18984  | 0.07716  |
| O2  | -0.51010                            | -0.52490 | -0.02883 | O2 | 0.46646                             | -0.50806 | -0.23953 |
| C3  | 0.45998                             | 0.51913  | 0.02153  | C3 | -0.57707                            | 0.37051  | -0.10431 |
| H4  | 0.32858                             | 1.17381  | -0.84345 | H4 | 1.89321                             | -0.17183 | 0.95459  |
| C5  | 1.81836                             | -0.15506 | 0.00440  | H5 | -0.31073                            | 1.40520  | -0.27220 |
| H6  | 1.94088                             | -0.81306 | 0.86440  | C6 | -1.80336                            | -0.06986 | 0.13544  |
| H7  | 1.94972                             | -0.74250 | -0.90365 | H7 | -2.62799                            | 0.62568  | 0.12885  |
| H8  | 2.60013                             | 0.60409  | 0.03947  | H8 | -2.01041                            | -1.11722 | 0.30090  |
| H9  | 0.31771                             | 1.11049  | 0.93118  |    |                                     |          |          |
| H10 | -2.20053                            | -0.18606 | 0.74221  |    |                                     |          |          |
|     | C <sub>2</sub> H <sub>3</sub> OOH-2 |          |          |    |                                     |          |          |
| O1  | -1.30682                            | -0.57482 | -0.09609 |    |                                     |          |          |
| O2  | -0.64566                            | 0.70923  | -0.01746 |    |                                     |          |          |
| C3  | 0.71126                             | 0.55494  | 0.01208  |    |                                     |          |          |
| H4  | 1.14167                             | 1.54886  | 0.02959  |    |                                     |          |          |
| C5  | 1.42355                             | -0.56118 | 0.01010  |    |                                     |          |          |
| H6  | 0.96989                             | -1.53763 | -0.02363 |    |                                     |          |          |
| H7  | 2.49920                             | -0.48529 | 0.03287  |    |                                     |          |          |
| H8  | -1.79979                            | -0.56379 | 0.73649  |    |                                     |          |          |

**Table S5** Cartesian coordinates of optimized geometries of four conformers of formic acetic anhydride (FAA) and two conformers of formic acid anhydride (FAN) predicted with the B3LYP/aug-cc-pVTZ method

|     | <i>x</i>         | <i>y</i> | <i>z</i> |     | <i>x</i>        | <i>y</i> | <i>z</i> |
|-----|------------------|----------|----------|-----|-----------------|----------|----------|
|     | FAA (F1)         |          |          |     | FAA (F2)        |          |          |
| C1  | 2.04832          | -0.79923 | 0.00000  | C1  | 2.04548         | -0.48282 | 0.33450  |
| H2  | 1.97791          | -1.44254 | -0.87724 | H2  | 2.30356         | -1.28553 | -0.35553 |
| H3  | 1.97792          | -1.44253 | 0.87725  | H3  | 1.88252         | -0.93569 | 1.31349  |
| H4  | 2.99219          | -0.26387 | -0.00002 | H4  | 2.85088         | 0.24244  | 0.39130  |
| C5  | 0.91569          | 0.17939  | 0.00000  | C5  | 0.78821         | 0.19644  | -0.11263 |
| O6  | -0.29703         | -0.50314 | 0.00000  | O6  | -0.21446        | -0.76412 | -0.35144 |
| O7  | 0.99710          | 1.37289  | 0.00000  | O7  | 0.62017         | 1.35689  | -0.30542 |
| C8  | -1.47363         | 0.22033  | -0.00001 | C8  | -1.54414        | -0.47921 | -0.15932 |
| H9  | -1.31355         | 1.30124  | -0.00002 | H9  | -2.13317        | -1.21935 | -0.71355 |
| O10 | -2.52217         | -0.33916 | 0.00000  | O10 | -1.98585        | 0.38118  | 0.53048  |
|     | FAA (F3)         |          |          |     | FAA (F4)        |          |          |
| C1  | 0.85764          | 1.35143  | 0.24733  | C1  | 1.31459         | 1.26817  | 0.00001  |
| H2  | 0.34428          | 1.58054  | 1.17964  | H2  | 0.90771         | 1.76256  | 0.88242  |
| H3  | 0.29814          | 1.82791  | -0.55594 | H3  | 0.90777         | 1.76254  | -0.88244 |
| H4  | 1.87463          | 1.73196  | 0.26692  | H4  | 2.39512         | 1.36846  | 0.00004  |
| C5  | 0.91313          | -0.12558 | 0.00740  | C5  | 0.99308         | -0.20305 | 0.00000  |
| O6  | -0.24306         | -0.87310 | 0.35762  | O6  | -0.34754        | -0.59393 | 0.00001  |
| O7  | 1.85163          | -0.74396 | -0.37759 | O7  | 1.80735         | -1.07186 | -0.00001 |
| C8  | -1.51119         | -0.44162 | 0.14337  | C8  | -1.40307        | 0.27666  | -0.00001 |
| H9  | -2.19869         | -1.15917 | 0.60538  | H9  | -1.12433        | 1.33572  | -0.00005 |
| O10 | -1.84306         | 0.53122  | -0.46561 | O10 | -2.52405        | -0.11920 | 0.00001  |
|     | <i>anti</i> -FAN |          |          |     | <i>syn</i> -FAN |          |          |
| O 1 | -2.13221         | -0.09405 | -0.00001 | O 1 | -1.43419        | -0.82189 | -0.18971 |
| C 2 | -0.97030         | -0.33095 | 0.00001  | C 2 | -1.20528        | 0.29117  | 0.14616  |
| O 3 | 1.76927          | -0.68031 | -0.00001 | O 3 | 1.43419         | -0.82189 | 0.18971  |
| C 4 | 1.29260          | 0.41201  | 0.00000  | C 4 | 1.20528         | 0.29117  | -0.14616 |
| H 5 | 1.85207          | 1.35344  | -0.00001 | H 5 | 1.92265         | 0.99529  | -0.58235 |
| O 6 | -0.04730         | 0.70924  | 0.00001  | O 6 | 0.00000         | 0.95820  | 0.00000  |
| H 7 | -0.50396         | -1.31881 | 0.00003  | H 7 | -1.92264        | 0.99528  | 0.58238  |

**Table S6** Harmonic, anharmonic, and scaled harmonic vibrational wavenumbers ( $\text{cm}^{-1}$ ) and IR intensities ( $\text{km mol}^{-1}$ , listed parenthetically) of conformers P1 and P2 of hydroperoxyethyl formate (HPEF) predicted with the B3LYP/aug-cc-pVTZ method

| Mode            | P1         |            |                           | P2         |            |                           |
|-----------------|------------|------------|---------------------------|------------|------------|---------------------------|
|                 | Harmonic   | Anharmonic | Scaled harm. <sup>a</sup> | Harmonic   | Anharmonic | Scaled harm. <sup>a</sup> |
| v <sub>1</sub>  | 3499 (276) | 3306       | 3361 (276)                | 3739 (41)  | 3555       | 3592 (41)                 |
| v <sub>2</sub>  | 3134 (7)   | 2992       | 3011 (7)                  | 3133 (5)   | 3025       | 3010 (5)                  |
| v <sub>3</sub>  | 3129 (12)  | 3007       | 3006 (12)                 | 3130 (11)  | 2990       | 3007 (11)                 |
| v <sub>4</sub>  | 3089 (5)   | 2955       | 2968 (5)                  | 3102 (2)   | 2969       | 2980 (2)                  |
| v <sub>5</sub>  | 3055 (5)   | 2939       | 2935 (5)                  | 3054 (5)   | 2952       | 2934 (5)                  |
| v <sub>6</sub>  | 3049 (46)  | 2904       | 2929 (46)                 | 3029 (53)  | 2883       | 2910 (53)                 |
| v <sub>7</sub>  | 1754 (306) | 1726       | 1720 (306)                | 1784 (310) | 1750       | 1749 (310)                |
| v <sub>8</sub>  | 1495 (72)  | 1449       | 1467 (72)                 | 1491 (4)   | 1449       | 1463 (4)                  |
| v <sub>9</sub>  | 1488 (22)  | 1447       | 1461 (22)                 | 1488 (5)   | 1447       | 1460 (5)                  |
| v <sub>10</sub> | 1485 (8)   | 1449       | 1458 (8)                  | 1414 (12)  | 1389       | 1388 (12)                 |
| v <sub>11</sub> | 1420 (11)  | 1383       | 1394 (11)                 | 1401 (1)   | 1368       | 1376 (1)                  |
| v <sub>12</sub> | 1406 (3)   | 1377       | 1380 (3)                  | 1383 (7)   | 1359       | 1358 (7)                  |
| v <sub>13</sub> | 1364 (8)   | 1329       | 1339 (8)                  | 1380 (53)  | 1334       | 1355 (53)                 |
| v <sub>14</sub> | 1356 (2)   | 1321       | 1331 (2)                  | 1357 (19)  | 1332       | 1333 (19)                 |
| v <sub>15</sub> | 1223 (286) | 1191       | 1202 (286)                | 1208 (78)  | 1175       | 1187 (78)                 |
| v <sub>16</sub> | 1176 (41)  | 1150       | 1155 (41)                 | 1176 (247) | 1145       | 1156 (247)                |
| v <sub>17</sub> | 1120 (111) | 1089       | 1102 (111)                | 1125 (168) | 1096       | 1106 (168)                |
| v <sub>18</sub> | 1059 (35)  | 1025       | 1042 (35)                 | 1063 (51)  | 1036       | 1046 (51)                 |
| v <sub>19</sub> | 1050 (1)   | 1039       | 1032 (1)                  | 1041 (1)   | 1017       | 1024 (1)                  |
| v <sub>20</sub> | 974 (18)   | 948        | 959 (18)                  | 961 (15)   | 936        | 945 (15)                  |
| v <sub>21</sub> | 871 (26)   | 855        | 858 (26)                  | 891 (27)   | 876        | 878 (27)                  |
| v <sub>22</sub> | 819 (20)   | 803        | 807 (20)                  | 850 (67)   | 835        | 838 (67)                  |
| v <sub>23</sub> | 755 (91)   | 723        |                           | 748 (16)   | 732        |                           |
| v <sub>24</sub> | 622 (107)  | 570        |                           | 549 (16)   | 541        |                           |
| v <sub>25</sub> | 536 (7)    | 511        |                           | 504 (3)    | 498        |                           |
| v <sub>26</sub> | 512 (6)    | 503        |                           | 399 (4)    | 394        |                           |
| v <sub>27</sub> | 347 (1)    | 336        |                           | 330 (35)   | 442        |                           |
| v <sub>28</sub> | 322 (7)    | 317        |                           | 255 (96)   | 95         |                           |
| v <sub>29</sub> | 286 (14)   | 284        |                           | 242 (21)   | 235        |                           |
| v <sub>30</sub> | 250 (6)    | 221        |                           | 212 (1)    | 315        |                           |
| v <sub>31</sub> | 219 (1)    | 250        |                           | 202 (2)    | 84         |                           |
| v <sub>32</sub> | 176 (7)    | 141        |                           | 139 (4)    | 139        |                           |
| v <sub>33</sub> | 79 (1)     | 83         |                           | 49 (3)     | 49         |                           |

<sup>a</sup> Harmonic vibrational wavenumber scaled according to  $0.9761 x + 7.9$ , in which  $x$  is the harmonic vibrational wavenumber for region  $800\text{--}2000 \text{ cm}^{-1}$ ; scaling factor is  $0.9607 x$  for region above  $3000 \text{ cm}^{-1}$ .

**Table S7** Harmonic, anharmonic, and scaled harmonic vibrational wavenumbers ( $\text{cm}^{-1}$ ) and IR intensities ( $\text{km mol}^{-1}$ , listed parenthetically) of conformer P3 of hydroperoxyethyl formate (HPEF) predicted with the B3LYP/aug-cc-pVTZ method

| Mode            | P3         |            |                              |
|-----------------|------------|------------|------------------------------|
|                 | Harmonic   | Anharmonic | Scaled harmonic <sup>a</sup> |
| v <sub>1</sub>  | 3749 (42)  | 3571       | 3601 (42)                    |
| v <sub>2</sub>  | 3158 (3)   | 3025       | 3034 (3)                     |
| v <sub>3</sub>  | 3123 (10)  | 2989       | 3000 (10)                    |
| v <sub>4</sub>  | 3094 (14)  | 2970       | 2972 (14)                    |
| v <sub>5</sub>  | 3059 (8)   | 2956       | 2939 (8)                     |
| v <sub>6</sub>  | 3014 (61)  | 2874       | 2896 (61)                    |
| v <sub>7</sub>  | 1795 (291) | 1757       | 1760 (291)                   |
| v <sub>8</sub>  | 1499 (5)   | 1454       | 1471 (5)                     |
| v <sub>9</sub>  | 1485 (8)   | 1439       | 1457 (8)                     |
| v <sub>10</sub> | 1419 (1)   | 1381       | 1393 (1)                     |
| v <sub>11</sub> | 1414 (12)  | 1374       | 1388 (12)                    |
| v <sub>12</sub> | 1404 (5)   | 1346       | 1379 (5)                     |
| v <sub>13</sub> | 1379 (28)  | 1408       | 1354 (28)                    |
| v <sub>14</sub> | 1361 (41)  | 1295       | 1336 (41)                    |
| v <sub>15</sub> | 1187 (120) | 1157       | 1167 (120)                   |
| v <sub>16</sub> | 1149 (158) | 1113       | 1130 (158)                   |
| v <sub>17</sub> | 1122 (248) | 1094       | 1103 (248)                   |
| v <sub>18</sub> | 1067 (15)  | 1035       | 1049 (15)                    |
| v <sub>19</sub> | 1043 (1)   | 1016       | 1026 (1)                     |
| v <sub>20</sub> | 956 (9)    | 928        | 941 (9)                      |
| v <sub>21</sub> | 880 (36)   | 864        | 867 (36)                     |
| v <sub>22</sub> | 816 (13)   | 804        | 804 (13)                     |
| v <sub>23</sub> | 769 (58)   | 745        |                              |
| v <sub>24</sub> | 555 (17)   | 542        |                              |
| v <sub>25</sub> | 516 (9)    | 510        |                              |
| v <sub>26</sub> | 384 (2)    | 379        |                              |
| v <sub>27</sub> | 303 (5)    | 314        |                              |
| v <sub>28</sub> | 234 (11)   | 236        |                              |
| v <sub>29</sub> | 217 (63)   | 185        |                              |
| v <sub>30</sub> | 202 (53)   | 255        |                              |
| v <sub>31</sub> | 193 (4)    | 122        |                              |
| v <sub>32</sub> | 140 (3)    | 157        |                              |
| v <sub>33</sub> | 62 (2)     | 39         |                              |

<sup>a</sup> Harmonic vibrational wavenumber scaled according to  $0.9761 x + 7.9$ , in which  $x$  is the harmonic vibrational wavenumber; this equation is only valid for wavenumbers below  $2000 \text{ cm}^{-1}$ . Scaling factor is  $0.9607 x$  for region above  $3000 \text{ cm}^{-1}$ .

**Table S8** Harmonic, anharmonic, and scaled harmonic vibrational wavenumbers ( $\text{cm}^{-1}$ ) and IR intensities ( $\text{km mol}^{-1}$ , listed parenthetically) of conformers Q1 and Q2 of hydroxylated secondary ozonide (HSOZ) predicted with the B3LYP/aug-cc-pVTZ method

| Mode            | Q1         |            |                              | Q2         |            |                              |
|-----------------|------------|------------|------------------------------|------------|------------|------------------------------|
|                 | Harmonic   | Anharmonic | Scaled harmonic <sup>a</sup> | Harmonic   | Anharmonic | Scaled harmonic <sup>a</sup> |
| v <sub>1</sub>  | 3778 (40)  | 3602       | 3629 (40)                    | 3765 (41)  | 3581       | 3617 (41)                    |
| v <sub>2</sub>  | 3130 (14)  | 3004       | 3007 (14)                    | 3131 (12)  | 3004       | 3008 (12)                    |
| v <sub>3</sub>  | 3124 (6)   | 2988       | 3001 (6)                     | 3121 (7)   | 2986       | 2998 (7)                     |
| v <sub>4</sub>  | 3106 (17)  | 2967       | 2984 (17)                    | 3092 (35)  | 2966       | 2970 (35)                    |
| v <sub>5</sub>  | 3052 (6)   | 2945       | 2932 (6)                     | 3051 (6)   | 2945       | 2931 (6)                     |
| v <sub>6</sub>  | 3006 (51)  | 2894       | 2888 (51)                    | 2996 (54)  | 2886       | 2878 (54)                    |
| v <sub>7</sub>  | 1488 (7)   | 1452       | 1460 (7)                     | 1488 (3)   | 1444       | 1461 (3)                     |
| v <sub>8</sub>  | 1487 (5)   | 1448       | 1459 (5)                     | 1486 (5)   | 1448       | 1458 (5)                     |
| v <sub>9</sub>  | 1442 (35)  | 1406       | 1416 (35)                    | 1448 (44)  | 1412       | 1421 (44)                    |
| v <sub>10</sub> | 1420 (62)  | 1389       | 1394 (62)                    | 1425 (84)  | 1392       | 1399 (84)                    |
| v <sub>11</sub> | 1397 (15)  | 1364       | 1372 (15)                    | 1400 (8)   | 1365       | 1374 (8)                     |
| v <sub>12</sub> | 1364 (17)  | 1335       | 1339 (17)                    | 1361 (21)  | 1331       | 1337 (21)                    |
| v <sub>13</sub> | 1308 (3)   | 1290       | 1285 (3)                     | 1322 (28)  | 1308       | 1299 (28)                    |
| v <sub>14</sub> | 1288 (15)  | 1236       | 1266 (15)                    | 1306 (4)   | 1248       | 1283 (4)                     |
| v <sub>15</sub> | 1162 (30)  | 1133       | 1142 (30)                    | 1160 (67)  | 1127       | 1140 (67)                    |
| v <sub>16</sub> | 1147 (58)  | 1115       | 1127 (58)                    | 1159 (212) | 1124       | 1139 (212)                   |
| v <sub>17</sub> | 1121 (106) | 1091       | 1102 (106)                   | 1144 (91)  | 1111       | 1125 (91)                    |
| v <sub>18</sub> | 1117 (397) | 1080       | 1099 (397)                   | 1113 (181) | 1083       | 1094 (181)                   |
| v <sub>19</sub> | 994 (54)   | 965        | 978 (54)                     | 998 (52)   | 974        | 982 (52)                     |
| v <sub>20</sub> | 941 (59)   | 911        | 927 (59)                     | 967 (74)   | 932        | 952 (74)                     |
| v <sub>21</sub> | 887 (29)   | 868        | 874 (29)                     | 943 (9)    | 918        | 929 (9)                      |
| v <sub>22</sub> | 875 (2)    | 858        | 862 (2)                      | 874 (5)    | 858        | 861 (5)                      |
| v <sub>23</sub> | 849 (4)    | 826        | 837 (4)                      | 852 (12)   | 832        | 839 (12)                     |
| v <sub>24</sub> | 803 (23)   | 786        |                              | 743 (30)   |            |                              |
| v <sub>25</sub> | 695 (5)    | 685        |                              | 684 (6)    |            |                              |
| v <sub>26</sub> | 560 (18)   | 548        |                              | 571 (16)   |            |                              |
| v <sub>27</sub> | 514 (9)    | 509        |                              | 491 (1)    |            |                              |
| v <sub>28</sub> | 500 (17)   | 484        |                              | 479 (37)   |            |                              |
| v <sub>29</sub> | 316 (1)    | 301        |                              | 334 (51)   |            |                              |
| v <sub>30</sub> | 298 (70)   | 361        |                              | 279 (11)   |            |                              |
| v <sub>31</sub> | 229 (8)    | 118        |                              | 225 (12)   |            |                              |
| v <sub>32</sub> | 197 (2)    | 241        |                              | 200 (0)    |            |                              |
| v <sub>33</sub> | 98 (1)     | 76         |                              | 78 (1)     |            |                              |

<sup>a</sup> Harmonic vibrational wavenumber scaled according to  $0.9761 x + 7.9$ , in which  $x$  is the harmonic vibrational wavenumber; this equation is only valid for wavenumbers below  $2000 \text{ cm}^{-1}$ . Scaling factor is  $0.9607 x$  for region above  $3000 \text{ cm}^{-1}$ .

**Table S9** Harmonic, anharmonic, and scaled harmonic vibrational wavenumbers ( $\text{cm}^{-1}$ ) and IR intensities ( $\text{km mol}^{-1}$ , listed parenthetically) of conformers P1\* and P2\* of hydroperoxyethyl formate (HPEF) predicted with the B3LYP/aug-cc-pVTZ method

| Mode            | P1*        |            |                              | P2*        |            |                              |
|-----------------|------------|------------|------------------------------|------------|------------|------------------------------|
|                 | Harmonic   | Anharmonic | Scaled harmonic <sup>a</sup> | Harmonic   | Anharmonic | Scaled harmonic <sup>a</sup> |
| v <sub>1</sub>  | 3473 (293) | 3257       | 3336 (293)                   | 3748 (39)  | 3571       | 3601 (39)                    |
| v <sub>2</sub>  | 3149 (7)   | 3040       | 3025 (7)                     | 3144 (5)   | 3028       | 3021 (5)                     |
| v <sub>3</sub>  | 3127 (8)   | 3003       | 3005 (8)                     | 3122 (11)  | 2999       | 2999 (11)                    |
| v <sub>4</sub>  | 3095 (6)   | 2988       | 2973 (6)                     | 3098 (5)   | 2973       | 2976 (5)                     |
| v <sub>5</sub>  | 3060 (6)   | 2970       | 2940 (6)                     | 3056 (7)   | 2960       | 2936 (7)                     |
| v <sub>6</sub>  | 3045 (49)  | 2902       | 2926 (49)                    | 3033 (51)  | 2889       | 2914 (51)                    |
| v <sub>7</sub>  | 1748 (285) | 1710       | 1714 (285)                   | 1794 (331) | 1760       | 1759 (331)                   |
| v <sub>8</sub>  | 1494 (85)  | 1457       | 1466 (85)                    | 1495 (2)   | 1450       | 1467 (2)                     |
| v <sub>9</sub>  | 1490 (15)  | 1447       | 1462 (15)                    | 1484 (8)   | 1436       | 1457 (8)                     |
| v <sub>10</sub> | 1485 (6)   | 1438       | 1457 (6)                     | 1421 (26)  | 1397       | 1395 (26)                    |
| v <sub>11</sub> | 1419 (22)  | 1407       | 1393 (22)                    | 1401 (3)   | 1365       | 1375 (3)                     |
| v <sub>12</sub> | 1411 (2)   | 1372       | 1386 (2)                     | 1395 (39)  | 1382       | 1369 (39)                    |
| v <sub>13</sub> | 1398 (18)  | 1357       | 1372 (18)                    | 1372 (34)  | 1312       | 1347 (34)                    |
| v <sub>14</sub> | 1368 (12)  | 1330       | 1344 (12)                    | 1349 (2)   | 1320       | 1324 (2)                     |
| v <sub>15</sub> | 1212 (231) | 1186       | 1191 (231)                   | 1186 (183) | 1153       | 1165 (183)                   |
| v <sub>16</sub> | 1163 (23)  | 1127       | 1143 (23)                    | 1161 (108) | 1130       | 1141 (108)                   |
| v <sub>17</sub> | 1124 (130) | 1096       | 1105 (130)                   | 1105 (172) | 1080       | 1086 (172)                   |
| v <sub>18</sub> | 1058 (25)  | 1033       | 1041 (25)                    | 1070 (97)  | 1042       | 1052 (97)                    |
| v <sub>19</sub> | 1047 (3)   | 1032       | 1030 (3)                     | 1042 (1)   | 1022       | 1025 (1)                     |
| v <sub>20</sub> | 940 (14)   | 918        | 926 (14)                     | 922 (24)   | 899        | 908 (24)                     |
| v <sub>21</sub> | 854 (45)   | 838        | 841 (45)                     | 865 (95)   | 843        | 852 (95)                     |
| v <sub>22</sub> | 829 (6)    | 821        | 817 (6)                      | 838 (16)   | 826        | 825 (16)                     |
| v <sub>23</sub> | 712 (110)  | 734        |                              | 754 (8)    | 743        |                              |
| v <sub>24</sub> | 662 (84)   | 664        |                              | 657 (9)    | 651        |                              |
| v <sub>25</sub> | 616 (26)   | 483        |                              | 508 (27)   | 501        |                              |
| v <sub>26</sub> | 469 (16)   | 468        |                              | 382 (9)    | 380        |                              |
| v <sub>27</sub> | 421 (5)    | 420        |                              | 309 (0)    | 318        |                              |
| v <sub>28</sub> | 315 (1)    | 325        |                              | 249 (66)   | 237        |                              |
| v <sub>29</sub> | 266 (12)   | 264        |                              | 239 (42)   | 352        |                              |
| v <sub>30</sub> | 255 (5)    | 254        |                              | 218 (25)   | 88         |                              |
| v <sub>31</sub> | 231 (2)    | 304        |                              | 206 (1)    | 225        |                              |
| v <sub>32</sub> | 193 (5)    | 140        |                              | 131 (5)    | 131        |                              |
| v <sub>33</sub> | 74 (1)     | 117        |                              | 29 (2)     | 65         |                              |

<sup>a</sup> Harmonic vibrational wavenumber scaled according to  $0.9761 x + 7.9$ , in which  $x$  is the harmonic vibrational wavenumber; this equation is only valid for wavenumbers below  $2000 \text{ cm}^{-1}$ . Scaling factor is  $0.9607 x$  for region above  $3000 \text{ cm}^{-1}$ .

**Table S10** Harmonic, anharmonic, and scaled harmonic vibrational wavenumbers ( $\text{cm}^{-1}$ ) and IR intensities ( $\text{km mol}^{-1}$ , listed parenthetically) of conformer P3\* of hydroperoxyethyl formate (HPEF) predicted with the B3LYP/aug-cc-pVTZ method

| Mode            | P3*        |            |                              |
|-----------------|------------|------------|------------------------------|
|                 | Harmonic   | Anharmonic | Scaled harmonic <sup>a</sup> |
| v <sub>1</sub>  | 3742 (41)  | 3558       | 3595 (41)                    |
| v <sub>2</sub>  | 3144 (5)   | 3022       | 3021 (5)                     |
| v <sub>3</sub>  | 3122 (10)  | 2995       | 2999 (10)                    |
| v <sub>4</sub>  | 3092 (4)   | 2971       | 2971 (4)                     |
| v <sub>5</sub>  | 3056 (6)   | 2958       | 2936 (6)                     |
| v <sub>6</sub>  | 3035 (50)  | 2888       | 2916 (50)                    |
| v <sub>7</sub>  | 1783 (322) | 1749       | 1749 (322)                   |
| v <sub>8</sub>  | 1493 (1)   | 1450       | 1465 (1)                     |
| v <sub>9</sub>  | 1488 (8)   | 1433       | 1460 (8)                     |
| v <sub>10</sub> | 1416 (29)  | 1390       | 1390 (29)                    |
| v <sub>11</sub> | 1400 (2)   | 1369       | 1374 (2)                     |
| v <sub>12</sub> | 1383 (66)  | 1375       | 1358 (66)                    |
| v <sub>13</sub> | 1376 (11)  | 1335       | 1351 (11)                    |
| v <sub>14</sub> | 1349 (2)   | 1306       | 1325 (2)                     |
| v <sub>15</sub> | 1198 (264) | 1166       | 1177 (264)                   |
| v <sub>16</sub> | 1160 (30)  | 1133       | 1140 (30)                    |
| v <sub>17</sub> | 1125 (166) | 1093       | 1106 (166)                   |
| v <sub>18</sub> | 1069 (79)  | 1042       | 1051 (79)                    |
| v <sub>19</sub> | 1040 (0)   | 1019       | 1023 (0)                     |
| v <sub>20</sub> | 923 (28)   | 898        | 909 (28)                     |
| v <sub>21</sub> | 874 (95)   | 851        | 861 (95)                     |
| v <sub>22</sub> | 852 (13)   | 838        | 840 (13)                     |
| v <sub>23</sub> | 744 (8)    | 729        |                              |
| v <sub>24</sub> | 633 (7)    | 626        |                              |
| v <sub>25</sub> | 502 (23)   | 500        |                              |
| v <sub>26</sub> | 412 (16)   | 406        |                              |
| v <sub>27</sub> | 298 (8)    | 274        |                              |
| v <sub>28</sub> | 266 (94)   | 419        |                              |
| v <sub>29</sub> | 250 (31)   | 67         |                              |
| v <sub>30</sub> | 231 (3)    | 322        |                              |
| v <sub>31</sub> | 201 (3)    | 102        |                              |
| v <sub>32</sub> | 123 (6)    | 137        |                              |
| v <sub>33</sub> | 32 (3)     | 32         |                              |

<sup>a</sup> Harmonic vibrational wavenumber scaled according to  $0.9761 x + 7.9$ , in which  $x$  is the harmonic vibrational wavenumber; this equation is only valid for wavenumbers below  $2000 \text{ cm}^{-1}$ . Scaling factor is  $0.9607 x$  for region above  $3000 \text{ cm}^{-1}$ .



**Table S11** Harmonic, anharmonic, and scaled harmonic vibrational wavenumbers ( $\text{cm}^{-1}$ ) and IR intensities ( $\text{km mol}^{-1}$ , listed parenthetically) of conformers Q1\* and Q2\* of hydroxylated secondary ozonide (HSOZ) predicted with the B3LYP/aug-cc-pVTZ method

| Mode            | Q1*        |            |                              | Q2*        |            |                              |
|-----------------|------------|------------|------------------------------|------------|------------|------------------------------|
|                 | Harmonic   | Anharmonic | Scaled harmonic <sup>a</sup> | Harmonic   | Anharmonic | Scaled harmonic <sup>a</sup> |
| v <sub>1</sub>  | 3779 (45)  | 3601       | 3630 (45)                    | 3765 (40)  | 3587       | 3617 (40)                    |
| v <sub>2</sub>  | 3128 (12)  | 2999       | 3005 (12)                    | 3123 (17)  | 2993       | 3000 (17)                    |
| v <sub>3</sub>  | 3113 (8)   | 2962       | 2991 (8)                     | 3111 (11)  | 2975       | 2989 (11)                    |
| v <sub>4</sub>  | 3112 (15)  | 2989       | 2990 (15)                    | 3079 (42)  | 2953       | 2958 (42)                    |
| v <sub>5</sub>  | 3061 (16)  | 2931       | 2941 (16)                    | 3053 (22)  | 2924       | 2933 (22)                    |
| v <sub>6</sub>  | 3045 (7)   | 2946       | 2926 (7)                     | 3043 (7)   | 2942       | 2923 (7)                     |
| v <sub>7</sub>  | 1489 (3)   | 1446       | 1462 (3)                     | 1489 (4)   | 1443       | 1461 (4)                     |
| v <sub>8</sub>  | 1486 (5)   | 1440       | 1458 (5)                     | 1486 (8)   | 1446       | 1458 (8)                     |
| v <sub>9</sub>  | 1434 (49)  | 1395       | 1408 (49)                    | 1442 (83)  | 1405       | 1416 (83)                    |
| v <sub>10</sub> | 1413 (50)  | 1387       | 1388 (50)                    | 1412 (47)  | 1385       | 1387 (47)                    |
| v <sub>11</sub> | 1385 (17)  | 1352       | 1360 (17)                    | 1389 (17)  | 1358       | 1364 (17)                    |
| v <sub>12</sub> | 1336 (20)  | 1299       | 1312 (20)                    | 1349 (22)  | 1318       | 1324 (22)                    |
| v <sub>13</sub> | 1302 (7)   | 1277       | 1278 (7)                     | 1325 (12)  | 1292       | 1301 (12)                    |
| v <sub>14</sub> | 1275 (15)  | 1234       | 1252 (15)                    | 1303 (7)   | 1261       | 1280 (7)                     |
| v <sub>15</sub> | 1150 (28)  | 1123       | 1130 (28)                    | 1173 (245) | 1136       | 1153 (245)                   |
| v <sub>16</sub> | 1117 (10)  | 1082       | 1098 (10)                    | 1147 (34)  | 1121       | 1127 (34)                    |
| v <sub>17</sub> | 1114 (572) | 1077       | 1095 (572)                   | 1116 (222) | 1079       | 1098 (222)                   |
| v <sub>18</sub> | 1076 (41)  | 1049       | 1058 (41)                    | 1088 (67)  | 1060       | 1070 (67)                    |
| v <sub>19</sub> | 992 (40)   | 965        | 976 (40)                     | 1002 (41)  | 977        | 986 (41)                     |
| v <sub>20</sub> | 943 (79)   | 912        | 928 (79)                     | 963 (65)   | 930        | 948 (65)                     |
| v <sub>21</sub> | 885 (9)    | 861        | 871 (9)                      | 930 (4)    | 908        | 916 (4)                      |
| v <sub>22</sub> | 872 (13)   | 852        | 859 (13)                     | 892 (26)   | 869        | 879 (26)                     |
| v <sub>23</sub> | 848 (5)    | 830        | 836 (5)                      | 844 (3)    | 826        | 832 (3)                      |
| v <sub>24</sub> | 800 (21)   | 784        |                              | 748 (11)   | 737        |                              |
| v <sub>25</sub> | 745 (1)    | 733        |                              | 705 (11)   | 694        |                              |
| v <sub>26</sub> | 564 (15)   | 556        |                              | 560 (12)   | 552        |                              |
| v <sub>27</sub> | 544 (21)   | 532        |                              | 483 (14)   | 483        |                              |
| v <sub>28</sub> | 468 (14)   | 460        |                              | 463 (30)   | 449        |                              |
| v <sub>29</sub> | 349 (6)    | 390        |                              | 379 (8)    | 379        |                              |
| v <sub>30</sub> | 290 (64)   | 258        |                              | 311 (64)   | 306        |                              |
| v <sub>31</sub> | 230 (0)    | 210        |                              | 235 (0)    | 285        |                              |
| v <sub>32</sub> | 196 (8)    | 149        |                              | 209 (3)    | 133        |                              |
| v <sub>33</sub> | 95 (1)     | 97         |                              | 78 (1)     | 78         |                              |

<sup>a</sup> Harmonic vibrational wavenumber scaled according to  $0.9761 x + 7.9$ , in which  $x$  is the harmonic vibrational wavenumber; this equation is only valid for wavenumbers below  $2000 \text{ cm}^{-1}$ . Scaling factor is  $0.9607 x$  for region above  $3000 \text{ cm}^{-1}$ .

**Table S12** Harmonic, anharmonic, and scaled harmonic vibrational wavenumbers ( $\text{cm}^{-1}$ ) and IR intensities ( $\text{km mol}^{-1}$ , listed parenthetically) of  $\text{C}_2\text{H}_5\text{OOH}$  predicted with the B3LYP/aug-cc-pVTZ method

| Mode            | $\text{C}_2\text{H}_5\text{OOH}$ |            |                              |
|-----------------|----------------------------------|------------|------------------------------|
|                 | Harmonic                         | Anharmonic | Scaled harmonic <sup>a</sup> |
| v <sub>1</sub>  | 3755 (38)                        | 3571       | 3607 (38)                    |
| v <sub>2</sub>  | 3110 (28)                        | 2971       | 2988 (28)                    |
| v <sub>3</sub>  | 3104 (21)                        | 2989       | 2982 (21)                    |
| v <sub>4</sub>  | 3044 (28)                        | 2900       | 2925 (28)                    |
| v <sub>5</sub>  | 3040 (15)                        | 2907       | 2920 (15)                    |
| v <sub>6</sub>  | 3005 (42)                        | 2857       | 2887 (42)                    |
| v <sub>7</sub>  | 1528 (6)                         | 1490       | 1499 (6)                     |
| v <sub>8</sub>  | 1501 (4)                         | 1457       | 1473 (4)                     |
| v <sub>9</sub>  | 1483 (6)                         | 1440       | 1456 (6)                     |
| v <sub>10</sub> | 1414 (5)                         | 1390       | 1388 (5)                     |
| v <sub>11</sub> | 1391 (0)                         | 1370       | 1366 (0)                     |
| v <sub>12</sub> | 1360 (57)                        | 1310       | 1336 (57)                    |
| v <sub>13</sub> | 1276 (1)                         | 1243       | 1253 (1)                     |
| v <sub>14</sub> | 1183 (5)                         | 1162       | 1163 (5)                     |
| v <sub>15</sub> | 1150 (23)                        | 1121       | 1131 (23)                    |
| v <sub>16</sub> | 1035 (17)                        | 1003       | 1019 (17)                    |
| v <sub>17</sub> | 951 (6)                          | 927        | 936 (6)                      |
| v <sub>18</sub> | 868 (8)                          | 853        | 855 (8)                      |
| v <sub>19</sub> | 829 (1)                          | 823        | 817 (1)                      |
| v <sub>20</sub> | 474 (8)                          | 468        |                              |
| v <sub>21</sub> | 296 (0)                          | 293        |                              |
| v <sub>22</sub> | 232 (5)                          | 217        |                              |
| v <sub>23</sub> | 188 (103)                        | 100        |                              |
| v <sub>24</sub> | 127 (6)                          | 121        |                              |

<sup>a</sup> Harmonic vibrational wavenumber scaled according to  $0.9761 x + 7.9$ , in which  $x$  is the harmonic vibrational wavenumber; this equation is only valid for wavenumbers below  $2000 \text{ cm}^{-1}$ . Scaling factor is  $0.9607 x$  for region above  $3000 \text{ cm}^{-1}$ .

**Table S13** Harmonic, anharmonic, and scaled harmonic vibrational wavenumbers ( $\text{cm}^{-1}$ ) and IR intensities ( $\text{km mol}^{-1}$ , listed parenthetically) of  $\text{C}_2\text{H}_3\text{OOH-1}$  and  $\text{C}_2\text{H}_3\text{OOH-2}$  predicted with the B3LYP/aug-cc-pVTZ method

| Mode       | $\text{C}_2\text{H}_3\text{OOH-1}$ |            |                              | $\text{C}_2\text{H}_3\text{OOH-2}$ |            |                              |
|------------|------------------------------------|------------|------------------------------|------------------------------------|------------|------------------------------|
|            | Harmonic                           | Anharmonic | Scaled harmonic <sup>a</sup> | Harmonic                           | Anharmonic | Scaled harmonic <sup>a</sup> |
| $\nu_1$    | 3736 (39)                          | 3553       | 3589 (39)                    | 3752 (56)                          | 3572       | 3604 (56)                    |
| $\nu_2$    | 3253 (2)                           | 3115       | 3125 (2)                     | 3270 (1)                           | 3131       | 3142 (1)                     |
| $\nu_3$    | 3189 (3)                           | 3054       | 3063 (3)                     | 3186 (1)                           | 3048       | 3061 (1)                     |
| $\nu_4$    | 3161 (1)                           | 3064       | 3037 (1)                     | 3171 (0)                           | 2998       | 3047 (0)                     |
| $\nu_5$    | 1683 (90)                          | 1641       | 1651 (90)                    | 1697 (138)                         | 1650       | 1664 (138)                   |
| $\nu_6$    | 1423 (3)                           | 1391       | 1396 (3)                     | 1431 (19)                          | 1423       | 1404 (19)                    |
| $\nu_7$    | 1370 (47)                          | 1339       | 1345 (47)                    | 1379 (36)                          | 1321       | 1354 (36)                    |
| $\nu_8$    | 1317 (2)                           | 1293       | 1294 (2)                     | 1324 (3)                           | 1292       | 1301 (3)                     |
| $\nu_9$    | 1181 (67)                          | 1153       | 1161 (67)                    | 1151 (40)                          | 1128       | 1132 (40)                    |
| $\nu_{10}$ | 993 (29)                           | 981        | 977 (29)                     | 971 (18)                           | 917        | 956 (18)                     |
| $\nu_{11}$ | 970 (10)                           | 935        | 954 (10)                     | 969 (24)                           | 972        | 954 (24)                     |
| $\nu_{12}$ | 884 (51)                           | 870        | 870 (51)                     | 892 (31)                           | 867        | 879 (31)                     |
| $\nu_{13}$ | 872 (25)                           | 843        | 859 (25)                     | 865 (59)                           | 846        | 852 (59)                     |
| $\nu_{14}$ | 711 (9)                            | 689        |                              | 709 (6)                            | 695        |                              |
| $\nu_{15}$ | 527 (8)                            | 521        |                              | 621 (5)                            | 611        |                              |
| $\nu_{16}$ | 347 (2)                            | 343        |                              | 320 (0)                            | 315        |                              |
| $\nu_{17}$ | 237 (106)                          | 146        |                              | 243 (5)                            | 229        |                              |
| $\nu_{18}$ | 92 (17)                            | 64         |                              | 131 (122)                          | 119        |                              |

<sup>a</sup> Harmonic vibrational wavenumber scaled according to  $0.9761 x + 7.9$ , in which  $x$  is the harmonic vibrational wavenumber; this equation is only valid for wavenumbers below  $2000 \text{ cm}^{-1}$ . Scaling factor is  $0.9607 x$  for region above  $3000 \text{ cm}^{-1}$ .

**Table S14** Rotational parameters of the ground state and vibrationally excited states ( $v = 1$ ) and ratios of  $a$ -,  $b$ -, and  $c$ -types of conformers P1 and P2 of HPEF predicted with the B3LYP/aug-cc-pVTZ method

| Mode     | HPEF (P1)              |                        |                        |            | HPEF (P2)              |                        |                        |            |
|----------|------------------------|------------------------|------------------------|------------|------------------------|------------------------|------------------------|------------|
|          | $A'/A''$               | $B'/B''$               | $C'/C''$               | $a-/b-/c-$ | $A'/A''$               | $B'/B''$               | $C'/C''$               | $a-/b-/c-$ |
| $v_1$    | 1.011                  | 0.997                  | 1.000                  | 66/34/0    | 1.001                  | 1.000                  | 1.000                  | 5/57/38    |
| $v_7$    | 1.000                  | 0.999                  | 0.999                  | 61/37/1    | 1.001                  | 0.998                  | 0.999                  | 55/0/44    |
| $v_8$    | 0.996                  | 1.002                  | 1.000                  | 9/80/11    | 1.001                  | 1.000                  | 1.001                  | 25/2/73    |
| $v_9$    | 0.999                  | 1.000                  | 1.001                  | 1/98/1     | 1.000                  | 1.001                  | 1.001                  | 0/4/96     |
| $v_{10}$ | 1.000                  | 1.001                  | 1.000                  | 1/21/78    | 0.999                  | 0.999                  | 0.999                  | 1/99/1     |
| $v_{11}$ | 1.000                  | 0.998                  | 0.999                  | 92/6/2     | 1.000                  | 1.000                  | 1.001                  | 21/1/78    |
| $v_{12}$ | 0.999                  | 1.001                  | 1.000                  | 36/60/4    | 1.002                  | 0.998                  | 1.003                  | 52/21/26   |
| $v_{13}$ | 0.999                  | 1.000                  | 0.999                  | 81/17/2    | 0.999                  | 0.999                  | 1.000                  | 21/76/3    |
| $v_{14}$ | 0.999                  | 1.000                  | 0.999                  | 41/16/42   | 1.002                  | 0.996                  | 0.993                  | 28/72/1    |
| $v_{15}$ | 0.999                  | 0.998                  | 0.998                  | 98/0/2     | 0.997                  | 0.999                  | 0.999                  | 71/29/0    |
| $v_{16}$ | 1.002                  | 1.000                  | 0.999                  | 70/17/13   | 1.001                  | 0.999                  | 0.999                  | 86/12/2    |
| $v_{17}$ | 0.996                  | 0.999                  | 0.999                  | 34/62/5    | 0.996                  | 0.999                  | 0.999                  | 100/0/0    |
| $v_{18}$ | 0.999                  | 0.998                  | 0.998                  | 79/5/16    | 0.997                  | 0.999                  | 0.998                  | 38/39/23   |
| $v_{19}$ | 1.000                  | 0.999                  | 1.000                  | 5/23/72    | 1.000                  | 1.000                  | 0.999                  | 43/39/18   |
| $v_{20}$ | 0.998                  | 0.999                  | 0.999                  | 67/31/2    | 0.997                  | 1.000                  | 0.999                  | 47/50/4    |
| $v_{21}$ | 0.998                  | 1.000                  | 0.999                  | 24/73/3    | 0.999                  | 0.999                  | 0.998                  | 100/0/0    |
| $v_{22}$ | 1.001                  | 0.998                  | 0.999                  | 17/79/5    | 0.997                  | 0.999                  | 0.999                  | 65/13/22   |
| $v = 0$  | $A'' / \text{cm}^{-1}$ | $B'' / \text{cm}^{-1}$ | $C'' / \text{cm}^{-1}$ |            | $A'' / \text{cm}^{-1}$ | $B'' / \text{cm}^{-1}$ | $C'' / \text{cm}^{-1}$ |            |
|          | 0.1188                 | 0.0845                 | 0.0524                 |            | 0.1344                 | 0.0638                 | 0.0496                 |            |

**Table S15** Rotational parameters of the ground state and vibrationally excited states ( $v = 1$ ) and ratios of  $a$ -,  $b$ -, and  $c$ -types of the conformer P3 of HPEF predicted with the B3LYP/aug-cc-pVTZ method

| Mode     | HPEF (P3)              |                        |                        |            |
|----------|------------------------|------------------------|------------------------|------------|
|          | $A'/A''$               | $B'/B''$               | $C'/C''$               | $a-/b-/c-$ |
| $v_1$    | 1.001                  | 0.999                  | 0.999                  | 0/93/7     |
| $v_7$    | 0.998                  | 1.000                  | 1.000                  | 27/0/73    |
| $v_8$    | 1.002                  | 0.999                  | 1.000                  | 17/32/51   |
| $v_9$    | 1.001                  | 1.000                  | 1.000                  | 13/0/86    |
| $v_{10}$ | 1.002                  | 0.999                  | 1.001                  | 8/1/92     |
| $v_{11}$ | 0.997                  | 1.000                  | 1.000                  | 1/83/16    |
| $v_{12}$ | 1.001                  | 1.000                  | 1.001                  | 39/2/59    |
| $v_{13}$ | 1.000                  | 0.998                  | 0.998                  | 42/56/2    |
| $v_{14}$ | 0.996                  | 1.000                  | 0.999                  | 50/49/1    |
| $v_{15}$ | 1.001                  | 1.000                  | 0.999                  | 44/27/29   |
| $v_{16}$ | 0.999                  | 0.999                  | 0.999                  | 54/42/3    |
| $v_{17}$ | 0.999                  | 0.997                  | 0.999                  | 91/8/1     |
| $v_{18}$ | 0.995                  | 1.000                  | 0.999                  | 36/64/0    |
| $v_{19}$ | 1.000                  | 1.000                  | 0.999                  | 88/10/2    |
| $v_{20}$ | 1.000                  | 0.998                  | 0.998                  | 24/69/7    |
| $v_{21}$ | 1.000                  | 0.998                  | 0.998                  | 76/2/21    |
| $v_{22}$ | 1.002                  | 0.996                  | 0.997                  | 81/0/19    |
|          | $A'' / \text{cm}^{-1}$ | $B'' / \text{cm}^{-1}$ | $C'' / \text{cm}^{-1}$ |            |
| $v = 0$  | 0.1211                 | 0.0722                 | 0.0583                 |            |

**Table S16** Rotational parameters of the ground state and vibrationally excited states ( $v = 1$ ) and ratios of  $a$ -,  $b$ -, and  $c$ -types of conformers Q1 and Q2 of HSOZ predicted with the B3LYP/aug-cc-pVTZ method

| Mode     | HSOZ (Q1)              |                        |                        |            | HSOZ (Q2)              |                        |                        |            |
|----------|------------------------|------------------------|------------------------|------------|------------------------|------------------------|------------------------|------------|
|          | $A'/A''$               | $B'/B''$               | $C'/C''$               | $a-/b-/c-$ | $A'/A''$               | $B'/B''$               | $C'/C''$               | $a-/b-/c-$ |
| $v_1$    | 1.001                  | 0.999                  | 0.999                  | 4/8/88     | 1.000                  | 1.000                  | 1.000                  | 10/2/88    |
| $v_7$    | 1.001                  | 1.001                  | 1.000                  | 0/1/99     | 1.000                  | 1.000                  | 1.001                  | 35/62/3    |
| $v_8$    | 1.000                  | 1.000                  | 1.001                  | 23/60/17   | 1.000                  | 1.001                  | 1.000                  | 0/1/99     |
| $v_9$    | 0.999                  | 1.001                  | 1.002                  | 32/32/36   | 1.000                  | 1.000                  | 1.001                  | 85/12/3    |
| $v_{10}$ | 0.999                  | 1.000                  | 1.001                  | 100/0/0    | 1.000                  | 0.999                  | 1.001                  | 99/1/1     |
| $v_{11}$ | 0.999                  | 1.000                  | 1.002                  | 95/3/2     | 1.000                  | 0.999                  | 1.001                  | 93/2/5     |
| $v_{12}$ | 0.999                  | 0.999                  | 0.996                  | 28/65/7    | 0.999                  | 1.000                  | 0.997                  | 0/99/1     |
| $v_{13}$ | 0.999                  | 1.000                  | 1.000                  | 73/9/18    | 1.000                  | 1.000                  | 0.999                  | 87/8/5     |
| $v_{14}$ | 0.999                  | 1.000                  | 0.999                  | 55/44/1    | 0.998                  | 1.000                  | 1.000                  | 11/67/23   |
| $v_{15}$ | 1.000                  | 1.001                  | 1.000                  | 21/3/75    | 0.999                  | 1.000                  | 0.999                  | 94/3/3     |
| $v_{16}$ | 0.996                  | 1.000                  | 1.003                  | 1/98/1     | 0.999                  | 1.000                  | 1.000                  | 77/11/12   |
| $v_{17}$ | 0.996                  | 0.999                  | 1.000                  | 57/1/42    | 1.001                  | 0.999                  | 1.001                  | 49/50/0    |
| $v_{18}$ | 0.997                  | 0.998                  | 0.999                  | 76/14/10   | 0.996                  | 0.997                  | 0.997                  | 84/7/9     |
| $v_{19}$ | 1.000                  | 0.998                  | 1.001                  | 48/12/40   | 1.003                  | 0.998                  | 1.000                  | 43/2/55    |
| $v_{20}$ | 0.998                  | 0.999                  | 0.998                  | 3/85/12    | 0.995                  | 0.999                  | 0.997                  | 6/93/1     |
| $v_{21}$ | 0.999                  | 0.999                  | 1.000                  | 8/89/4     | 0.997                  | 0.999                  | 0.999                  | 16/26/58   |
| $v_{22}$ | 0.999                  | 1.000                  | 1.000                  | 3/7/90     | 1.000                  | 1.000                  | 0.998                  | 0/99/0     |
| $v_{23}$ | 0.998                  | 0.998                  | 0.997                  | 0/1/99     | 0.998                  | 0.999                  | 0.999                  | 42/56/2    |
| $v_{24}$ | 1.002                  | 0.998                  | 0.997                  | 23/60/17   | 1.000                  | 0.999                  | 1.000                  | 55/23/22   |
|          | $A'' / \text{cm}^{-1}$ | $B'' / \text{cm}^{-1}$ | $C'' / \text{cm}^{-1}$ |            | $A'' / \text{cm}^{-1}$ | $B'' / \text{cm}^{-1}$ | $C'' / \text{cm}^{-1}$ |            |
| $v = 0$  | 0.1747                 | 0.0754                 | 0.0636                 |            | 0.2037                 | 0.0706                 | 0.0571                 |            |

**Table S17** Rotational parameters of the ground state and vibrationally excited states ( $v = 1$ ) and ratios of  $a$ -,  $b$ -, and  $c$ -types of conformers P1\* and P2\* of HPEF predicted with the B3LYP/aug-cc-pVTZ method

| Mode     | HPEF (P1*)             |                        |                        |            | HPEF (P2*)             |                        |                        |            |
|----------|------------------------|------------------------|------------------------|------------|------------------------|------------------------|------------------------|------------|
|          | $A'/A''$               | $B'/B''$               | $C'/C''$               | $a-/b-/c-$ | $A'/A''$               | $B'/B''$               | $C'/C''$               | $a-/b-/c-$ |
| $v_1$    | 1.001                  | 1.004                  | 0.998                  | 96/1/3     | 1.004                  | 0.997                  | 0.998                  | 1/73/26    |
| $v_7$    | 0.999                  | 1.000                  | 1.000                  | 7/78/14    | 1.002                  | 0.996                  | 0.998                  | 58/2/40    |
| $v_8$    | 1.000                  | 0.999                  | 0.999                  | 13/63/24   | 1.000                  | 1.000                  | 1.001                  | 25/30/45   |
| $v_9$    | 1.001                  | 1.001                  | 1.000                  | 13/76/10   | 1.002                  | 1.000                  | 1.000                  | 10/4/86    |
| $v_{10}$ | 1.001                  | 1.001                  | 1.000                  | 43/19/38   | 0.998                  | 0.999                  | 0.999                  | 1/97/2     |
| $v_{11}$ | 0.998                  | 0.999                  | 1.000                  | 21/13/66   | 1.000                  | 1.000                  | 1.001                  | 41/0/59    |
| $v_{12}$ | 1.001                  | 0.999                  | 1.000                  | 9/82/10    | 1.003                  | 0.998                  | 1.000                  | 52/36/12   |
| $v_{13}$ | 1.000                  | 1.001                  | 1.002                  | 39/55/7    | 0.998                  | 1.002                  | 1.001                  | 44/5/52    |
| $v_{14}$ | 0.998                  | 0.997                  | 0.997                  | 41/32/28   | 0.996                  | 0.999                  | 0.997                  | 28/53/18   |
| $v_{15}$ | 0.999                  | 0.998                  | 0.999                  | 77/22/1    | 0.997                  | 1.002                  | 1.000                  | 83/16/1    |
| $v_{16}$ | 1.002                  | 1.000                  | 1.000                  | 32/1/67    | 0.997                  | 1.000                  | 1.000                  | 92/7/1     |
| $v_{17}$ | 0.995                  | 0.999                  | 1.000                  | 85/5/10    | 0.996                  | 1.001                  | 1.001                  | 93/4/3     |
| $v_{18}$ | 0.999                  | 0.998                  | 0.999                  | 85/10/5    | 0.998                  | 0.998                  | 0.998                  | 69/21/10   |
| $v_{19}$ | 0.999                  | 1.000                  | 0.999                  | 94/3/2     | 0.999                  | 1.000                  | 0.999                  | 55/45/0    |
| $v_{20}$ | 0.999                  | 0.999                  | 0.999                  | 1/0/0      | 0.999                  | 0.999                  | 0.999                  | 66/8/27    |
| $v_{21}$ | 0.997                  | 1.000                  | 0.999                  | 66/34/0    | 0.996                  | 1.000                  | 0.999                  | 81/5/13    |
| $v_{22}$ | 0.999                  | 0.999                  | 1.000                  | 70/3/27    | 0.996                  | 1.002                  | 1.000                  | 14/10/76   |
|          | $A'' / \text{cm}^{-1}$ | $B'' / \text{cm}^{-1}$ | $C'' / \text{cm}^{-1}$ |            | $A'' / \text{cm}^{-1}$ | $B'' / \text{cm}^{-1}$ | $C'' / \text{cm}^{-1}$ |            |
| $v = 0$  | 0.1167                 | 0.0856                 | 0.0643                 |            | 0.1499                 | 0.0598                 | 0.0518                 |            |

**Table S18** Rotational parameters of the ground state and vibrationally excited states ( $v = 1$ ) and ratios of  $a$ -,  $b$ -, and  $c$ -types of the conformer P3\* of HPEF predicted with the B3LYP/aug-cc-pVTZ method

| Mode     | HPEF (P3*)             |                        |                        |            |
|----------|------------------------|------------------------|------------------------|------------|
|          | $A'/A''$               | $B'/B''$               | $C'/C''$               | $a-/b-/c-$ |
| $v_1$    | 1.000                  | 1.001                  | 1.000                  | 3/85/12    |
| $v_7$    | 1.002                  | 0.999                  | 0.999                  | 70/11/19   |
| $v_8$    | 1.000                  | 1.000                  | 1.000                  | 85/8/7     |
| $v_9$    | 1.000                  | 1.000                  | 1.000                  | 11/14/76   |
| $v_{10}$ | 0.999                  | 1.000                  | 0.999                  | 0/84/15    |
| $v_{11}$ | 1.000                  | 1.001                  | 1.000                  | 40/12/48   |
| $v_{12}$ | 1.000                  | 0.999                  | 1.000                  | 57/18/24   |
| $v_{13}$ | 1.009                  | 0.999                  | 1.001                  | 18/12/70   |
| $v_{14}$ | 0.994                  | 1.000                  | 0.997                  | 75/17/8    |
| $v_{15}$ | 0.997                  | 0.997                  | 0.998                  | 91/9/0     |
| $v_{16}$ | 1.002                  | 1.001                  | 1.000                  | 80/1/19    |
| $v_{17}$ | 0.991                  | 0.997                  | 0.999                  | 93/2/5     |
| $v_{18}$ | 0.997                  | 0.999                  | 0.999                  | 60/37/4    |
| $v_{19}$ | 0.999                  | 1.000                  | 1.000                  | 49/47/4    |
| $v_{20}$ | 0.998                  | 1.000                  | 0.999                  | 56/25/19   |
| $v_{21}$ | 0.997                  | 0.997                  | 0.998                  | 88/2/10    |
| $v_{22}$ | 0.996                  | 0.999                  | 0.999                  | 1/70/30    |
|          | $A'' / \text{cm}^{-1}$ | $B'' / \text{cm}^{-1}$ | $C'' / \text{cm}^{-1}$ |            |
| $v = 0$  | 0.1754                 | 0.0551                 | 0.0491                 |            |



**Table S19** Rotational parameters of the ground state and vibrationally excited states ( $v = 1$ ) and ratios of  $a$ -,  $b$ -, and  $c$ -types of conformers Q1\* and Q2\* of HSOZ predicted with the B3LYP/aug-cc-pVTZ method

| Mode            | HSOZ (Q1*)             |                        |                        |            | HSOZ (Q2*)             |                        |                        |            |
|-----------------|------------------------|------------------------|------------------------|------------|------------------------|------------------------|------------------------|------------|
|                 | $A'/A''$               | $B'/B''$               | $C'/C''$               | $a-/b-/c-$ | $A'/A''$               | $B'/B''$               | $C'/C''$               | $a-/b-/c-$ |
| v <sub>1</sub>  | 1.000                  | 1.000                  | 1.000                  | 7/4//89    | 0.999                  | 1.000                  | 1.003                  | 0/48/52    |
| v <sub>7</sub>  | 1.001                  | 1.000                  | 1.001                  | 11/82/7    | 1.003                  | 0.999                  | 1.000                  | 1/13/87    |
| v <sub>8</sub>  | 1.000                  | 1.001                  | 1.000                  | 12/1/88    | 1.000                  | 1.001                  | 1.000                  | 47/18/36   |
| v <sub>9</sub>  | 1.000                  | 1.000                  | 1.001                  | 96/3/1     | 1.000                  | 1.000                  | 1.001                  | 73/15/12   |
| v <sub>10</sub> | 0.999                  | 0.999                  | 1.000                  | 85/1/14    | 0.998                  | 0.999                  | 1.000                  | 69/14/17   |
| v <sub>11</sub> | 0.999                  | 1.000                  | 1.003                  | 97/3/0     | 0.999                  | 1.000                  | 1.003                  | 96/4/0     |
| v <sub>12</sub> | 1.000                  | 1.000                  | 0.997                  | 7/92/1     | 0.997                  | 1.000                  | 0.999                  | 5/88/8     |
| v <sub>13</sub> | 1.000                  | 1.000                  | 1.000                  | 93/4/3     | 0.998                  | 1.000                  | 1.000                  | 88/2/10    |
| v <sub>14</sub> | 0.999                  | 1.000                  | 0.997                  | 99/0/1     | 0.997                  | 1.000                  | 0.999                  | 72/6/22    |
| v <sub>15</sub> | 1.003                  | 1.002                  | 0.999                  | 30/1/69    | 0.995                  | 1.001                  | 1.001                  | 72/17/11   |
| v <sub>16</sub> | 0.999                  | 0.996                  | 1.000                  | 19/17/63   | 1.003                  | 1.002                  | 0.999                  | 63/1/36    |
| v <sub>17</sub> | 0.999                  | 0.998                  | 1.000                  | 98/0/2     | 0.997                  | 0.997                  | 1.004                  | 97/1/1     |
| v <sub>18</sub> | 0.997                  | 1.000                  | 0.998                  | 6/94/0     | 0.993                  | 1.001                  | 0.999                  | 5/75/20    |
| v <sub>19</sub> | 1.002                  | 0.998                  | 1.000                  | 3/6/91     | 0.999                  | 1.000                  | 1.001                  | 45/3/52    |
| v <sub>20</sub> | 0.995                  | 0.999                  | 0.998                  | 1/95/4     | 0.999                  | 0.997                  | 0.997                  | 17/73/10   |
| v <sub>21</sub> | 0.999                  | 1.000                  | 0.999                  | 31/63/6    | 0.999                  | 1.000                  | 1.001                  | 2/35/63    |
| v <sub>22</sub> | 0.998                  | 0.999                  | 0.999                  | 4/96/0     | 0.995                  | 1.000                  | 1.000                  | 1/99/0     |
| v <sub>23</sub> | 0.998                  | 0.999                  | 0.999                  | 11/82/7    | 1.000                  | 0.998                  | 0.997                  | 57/9/34    |
| v <sub>24</sub> | 1.000                  | 0.999                  | 1.000                  | 12/1/88    | 1.003                  | 0.998                  | 0.998                  | 14/49/38   |
|                 | $A'' / \text{cm}^{-1}$ | $B'' / \text{cm}^{-1}$ | $C'' / \text{cm}^{-1}$ |            | $A'' / \text{cm}^{-1}$ | $B'' / \text{cm}^{-1}$ | $C'' / \text{cm}^{-1}$ |            |
| $v = 0$         | 0.1900                 | 0.0748                 | 0.0657                 |            | 0.1635                 | 0.0779                 | 0.0665                 |            |

**Table S20** Rotational parameters of the ground state and vibrationally excited states ( $v = 1$ ) and ratios of  $a$ -,  $b$ -, and  $c$ -types of  $C_2H_5OOH$  predicted with the B3LYP/aug-cc-pVTZ method

| Mode     | $C_2H_5OOH$            |                        |                        |            |
|----------|------------------------|------------------------|------------------------|------------|
|          | $A'/A''$               | $B'/B''$               | $C'/C''$               | $a-/b-/c-$ |
| $v_1$    | 0.998                  | 1.000                  | 1.000                  | 51/8/41    |
| $v_7$    | 0.998                  | 1.000                  | 1.002                  | 83/17/0    |
| $v_8$    | 0.998                  | 1.000                  | 1.002                  | 49/51/0    |
| $v_9$    | 1.004                  | 1.002                  | 1.000                  | 0/0/100    |
| $v_{10}$ | 0.997                  | 0.998                  | 0.997                  | 96/4/0     |
| $v_{11}$ | 0.998                  | 0.999                  | 0.998                  | 20/79/1    |
| $v_{12}$ | 1.000                  | 0.999                  | 0.998                  | 93/7/0     |
| $v_{13}$ | 0.999                  | 0.999                  | 1.001                  | 51/17/32   |
| $v_{14}$ | 1.020                  | 0.999                  | 0.998                  | 9/0/90     |
| $v_{15}$ | 0.976                  | 0.998                  | 1.000                  | 18/82/0    |
| $v_{16}$ | 0.995                  | 0.996                  | 0.995                  | 57/43/0    |
| $v_{17}$ | 0.998                  | 0.996                  | 0.997                  | 98/0/2     |
| $v_{18}$ | 1.004                  | 0.998                  | 0.997                  | 46/54/0    |
| $v_{19}$ | 0.997                  | 0.999                  | 0.999                  | 17/0/82    |
|          | $A'' / \text{cm}^{-1}$ | $B'' / \text{cm}^{-1}$ | $C'' / \text{cm}^{-1}$ |            |
| $v = 0$  | 1.0292                 | 0.1369                 | 0.1279                 |            |

**Table S21** Rotational parameters of the ground state and vibrationally excited states ( $v = 1$ ) and ratios of  $a$ -,  $b$ -, and  $c$ -types of C<sub>2</sub>H<sub>3</sub>OOH-1 and C<sub>2</sub>H<sub>3</sub>OOH-2 predicted with the B3LYP/aug-cc-pVTZ method

| Mode       | C <sub>2</sub> H <sub>3</sub> OOH-1 |                        |                        |            | C <sub>2</sub> H <sub>3</sub> OOH-2 |                        |                        |            |
|------------|-------------------------------------|------------------------|------------------------|------------|-------------------------------------|------------------------|------------------------|------------|
|            | $A'/A''$                            | $B'/B''$               | $C'/C''$               | $a-/b-/c-$ | $A'/A''$                            | $B'/B''$               | $C'/C''$               | $a-/b-/c-$ |
| $\nu_1$    | 0.993                               | 1.000                  | 1.002                  | 37/9/55    | 0.997                               | 0.999                  | 1.001                  | 60/2/39    |
| $\nu_5$    | 0.998                               | 0.997                  | 0.998                  | 97/0/3     | 0.996                               | 0.999                  | 0.998                  | 81/19/0    |
| $\nu_6$    | 1.002                               | 1.001                  | 1.000                  | 82/17/1    | 1.001                               | 1.000                  | 1.000                  | 58/41/0    |
| $\nu_7$    | 0.989                               | 0.999                  | 1.001                  | 78/15/7    | 0.997                               | 1.000                  | 0.999                  | 28/72/0    |
| $\nu_8$    | 1.004                               | 1.000                  | 0.999                  | 0/68/32    | 0.999                               | 1.002                  | 1.000                  | 4/96/0     |
| $\nu_9$    | 1.002                               | 0.998                  | 0.997                  | 86/14/1    | 0.999                               | 0.999                  | 0.997                  | 85/15/0    |
| $\nu_{10}$ | 0.992                               | 1.001                  | 1.000                  | 57/0/42    | 0.998                               | 0.999                  | 1.000                  | 18/21/61   |
| $\nu_{11}$ | 0.984                               | 0.998                  | 1.002                  | 12/3/85    | 0.999                               | 0.999                  | 1.000                  | 22/31/47   |
| $\nu_{12}$ | 1.013                               | 0.997                  | 0.995                  | 6/4/90     | 0.999                               | 0.997                  | 0.995                  | 90/10/0    |
| $\nu_{13}$ | 1.005                               | 0.997                  | 0.997                  | 63/3/34    | 0.998                               | 0.998                  | 1.000                  | 0/0/99     |
|            | $A'' / \text{cm}^{-1}$              | $B'' / \text{cm}^{-1}$ | $C'' / \text{cm}^{-1}$ |            | $A'' / \text{cm}^{-1}$              | $B'' / \text{cm}^{-1}$ | $C'' / \text{cm}^{-1}$ |            |
| $\nu = 0$  | 1.3711                              | 0.1522                 | 0.1416                 |            | 0.62730                             | 0.21780                | 0.16320                |            |

**Table S22** Comparison of experimentally observed vibrational wavenumbers and relative IR intensities of FAA (F1) with literature values

| Mode            | Experiment<br>/cm <sup>-1</sup> | Literature <sup>a</sup><br>/cm <sup>-1</sup> | Literature <sup>b</sup><br>/cm <sup>-1</sup> | Mode<br>Description <sup>c</sup> |
|-----------------|---------------------------------|----------------------------------------------|----------------------------------------------|----------------------------------|
| v <sub>5</sub>  | 1810 (35) <sup>d</sup>          | 1810 (23)                                    | 1808 (s)                                     | <i>iph.</i> C=O/C=O stretch      |
| v <sub>6</sub>  | 1792 (94)                       | 1792 (75)                                    | 1792 (vs)                                    | <i>oph.</i> C=O/C=O stretch      |
| v <sub>7</sub>  |                                 |                                              | 1442 (vw)                                    | CH <sub>3</sub> deformation      |
| v <sub>8</sub>  |                                 |                                              | 1431 (vw)                                    | CH <sub>2</sub> scissor          |
| v <sub>9</sub>  | 1378 (14)                       | 1378 (10)                                    | 1378 (m)                                     | CH <sub>3</sub> umbrella         |
| v <sub>10</sub> |                                 |                                              | 1378 (m)                                     | CH <i>ip</i> -bend               |
| v <sub>11</sub> | 1199 (76)                       | 1200 (67)                                    | 1200 (vs)                                    | <i>oph</i> -CC/CO stretch        |
| v <sub>12</sub> |                                 |                                              | 1133 (m)                                     | OC(O)C <i>op</i> -deformation    |
| v <sub>13</sub> | 1045 (100)                      | 1045 (100)                                   | 1049 (vs)                                    | ( <sub>O</sub> )CO stretch       |
| v <sub>14</sub> |                                 |                                              | 998 (w)                                      | CH <i>op</i> -bend               |
| v <sub>15</sub> |                                 |                                              | 980 (m)                                      | CH <sub>3</sub> wag              |
| v <sub>16</sub> | 933 (17)                        | 930 (18)                                     | 930 (m)                                      | <i>iph</i> -CC/CO stretch        |

<sup>a</sup>B. Behera, K. Takahashi and Y.-P. Lee, *Phys. Chem. Chem. Phys.*, 2022, **24**, 18568. <sup>b</sup>G. Wu, S. Shlykov, C. V. Alsenoy, H. J. Geise, E. Sluyts and B. J. van der Veken, *J. Phys. Chem.*, 1996, **100**, 11620. <sup>c</sup> Approximate mode description: *ip*: in-plane; *op*: out-of-plane; *iph*: in-phase; *oph*: out-of-phase. <sup>d</sup> Percentage integrated IR intensities relative to the most intense band (v<sub>13</sub>) at 1045 cm<sup>-1</sup> are listed in parentheses.

**Table S23** Experimental conditions and first-order rate coefficients  $k^I$  and  $k^{I'}$  of the reaction  $\text{CH}_3\text{CHOO} + \text{HC(O)OH}$  in four sets of experiments

| Set | Expt. | [CH <sub>3</sub> ]              | [HC(O)]                        | [O <sub>2</sub> ] <sub>0</sub> | [CH <sub>3</sub> ]             | A <sub>6</sub> <sup>b</sup>      |                                  | A <sub>7</sub> <sup>b</sup>      |                                  |
|-----|-------|---------------------------------|--------------------------------|--------------------------------|--------------------------------|----------------------------------|----------------------------------|----------------------------------|----------------------------------|
|     |       | CHI <sub>2</sub> ] <sub>0</sub> | OH] <sub>0</sub>               |                                | CHI] <sub>0</sub>              | $k_1^I$                          | $k_1^{I'}$                       | $k_1^I$                          | $k_1^{I'}$                       |
|     |       | /10 <sup>14</sup> <sup>a</sup>  | /10 <sup>15</sup> <sup>a</sup> | /10 <sup>18</sup> <sup>a</sup> | /10 <sup>14</sup> <sup>a</sup> | /10 <sup>5</sup> s <sup>-1</sup> |
| 1   | 1     | 12.6                            | 0.35                           | 1.3                            | 3.3                            | 1.56 (0.19)                      | 1.23 (0.09)                      | 1.12 (0.19)                      | 0.80 (0.09)                      |
|     | 2     | 12.6                            | 1.21                           | 1.3                            | 3.1                            | 2.95 (0.16)                      | 2.59 (0.13)                      | 2.46 (0.16)                      | 2.13 (0.25)                      |
|     | 3     | 12.6                            | 1.47                           | 1.3                            | 3.6                            | 3.60 (0.26)                      | 3.18 (0.18)                      | 3.12 (0.26)                      | 2.75 (0.24)                      |
|     | 4     | 12.6                            | 1.91                           | 1.3                            | 2.9                            | 4.33 (0.36)                      | 3.98 (0.21)                      | 4.36 (0.36)                      | 4.03 (0.36)                      |
|     | 5     | 12.6                            | 2.69                           | 1.3                            | 2.9                            | 6.12 (0.40)                      | 5.83 (0.30)                      | 5.92 (0.40)                      | 5.64 (0.52)                      |
|     | 6     | 12.6                            | 2.93                           | 1.3                            | 2.8                            | 6.72 (0.42)                      | 6.45 (0.28)                      | 6.77 (0.42)                      | 6.51 (0.56)                      |
| 2   | 7     | 19.4                            | 0.95                           | 1.3                            | 5.9                            | 2.20 (0.10)                      | 1.67 (0.05)                      | 1.87 (0.10)                      | 1.38 (0.11)                      |
|     | 8     | 19.4                            | 1.04                           | 1.3                            | 5.2                            | 2.32 (0.09)                      | 1.87 (0.11)                      | 2.06 (0.09)                      | 1.61 (0.18)                      |
|     | 9     | 19.4                            | 1.75                           | 1.3                            | 5.5                            | 3.58 (0.13)                      | 3.22 (0.13)                      | 3.60 (0.13)                      | 3.07 (0.22)                      |
|     | 10    | 19.4                            | 2.27                           | 1.3                            | 6.2                            | 4.75 (0.23)                      | 4.19 (0.15)                      | 4.45 (0.23)                      | 3.86 (0.27)                      |
|     | 11    | 19.4                            | 2.95                           | 1.3                            | 4.9                            | 6.25 (0.36)                      | 5.81 (0.23)                      | 5.90 (0.36)                      | 5.49 (0.42)                      |
|     | 12    | 19.4                            | 3.73                           | 1.3                            | 5.0                            | 8.05 (0.52)                      | 7.75 (0.28)                      | 8.84 (0.52)                      | 7.66 (0.44)                      |
| 3   | 13    | 16.2                            | 0.43                           | 1.3                            | 5.1                            | 1.80 (0.14)                      | 1.34 (0.09)                      | 1.51 (0.14)                      | 1.14 (0.10)                      |
|     | 14    | 16.2                            | 0.95                           | 1.3                            | 4.5                            | 2.28 (0.09)                      | 1.86 (0.10)                      | 1.82 (0.09)                      | 1.40 (0.10)                      |
|     | 15    | 16.2                            | 1.71                           | 1.3                            | 4.8                            | 3.84 (0.17)                      | 3.36 (0.13)                      | 3.50 (0.17)                      | 3.04 (0.13)                      |
|     | 16    | 16.2                            | 2.27                           | 1.3                            | 4.6                            | 5.23 (0.39)                      | 4.79 (0.20)                      | 4.80 (0.39)                      | 4.44 (0.20)                      |
|     | 17    | 16.2                            | 2.86                           | 1.3                            | 4.6                            | 6.45 (0.54)                      | 6.02 (0.21)                      | 6.28 (0.54)                      | 5.85 (0.28)                      |
|     | 18    | 16.2                            | 3.72                           | 1.3                            | 4.6                            | 8.21 (0.83)                      | 7.90 (0.32)                      | 9.10 (0.83)                      | 9.29 (0.50)                      |
| 4   | 19    | 15.6                            | 0.47                           | 2.6                            | 1.8                            | 0.78 (0.18)                      | 1.09 (0.12)                      | 1.22 (0.18)                      | 1.00 (0.15)                      |
|     | 20    | 15.6                            | 0.80                           | 2.6                            | 1.5                            | 1.93 (0.24)                      | 1.69 (0.21)                      | 1.71 (0.24)                      | 1.53 (0.16)                      |
|     | 21    | 15.6                            | 1.71                           | 2.6                            | 1.6                            | 4.18 (0.08)                      | 3.82 (0.30)                      | <i>5.17 (0.64)</i>               | <i>4.79 (0.48)</i>               |
|     | 22    | 15.6                            | 2.30                           | 2.6                            | 1.2                            | 5.39 (0.17)                      | 5.02 (0.45)                      | 4.95 (0.17)                      | 4.63 (0.47)                      |
|     | 23    | 15.6                            | 2.83                           | 2.6                            | 2.4                            | 6.16 (0.19)                      | 5.66 (0.44)                      | 6.67 (0.19)                      | 6.21 (0.49)                      |
|     | 24    | 15.6                            | 3.44                           | 2.6                            | 2.7                            | 8.97 (0.54)                      | 8.32 (0.75)                      | 7.75 (0.54)                      | 7.23 (0.50)                      |

<sup>a</sup> in unit of molecule cm<sup>-3</sup>. <sup>b</sup> Bands A<sub>6</sub> and A<sub>7</sub> are integrated over 1150–1175 cm<sup>-1</sup> and 1180–1210 cm<sup>-1</sup>, respectively.  $k_1^I$  and  $k_1^{I'}$  are rate coefficients obtained from exponential fit and model fit, respectively. The standard deviations in fitting are listed in parentheses. Outlier data points excluded in the fitting (Fig. 12) are listed in italic.

**Table S24** The kinetic model employed in fitting the temporal profiles of bands A<sub>6</sub> and A<sub>7</sub> in the reaction CH<sub>3</sub>CHOO + HC(O)OH

|   | Reaction                                                        | Rate coefficient <sup>a</sup>                  |                       | Reference |
|---|-----------------------------------------------------------------|------------------------------------------------|-----------------------|-----------|
|   |                                                                 | 40 Torr                                        | 80 Torr               |           |
| 1 | CH <sub>3</sub> CHI + O <sub>2</sub> → CH <sub>3</sub> CHOO + I | 6.1×10 <sup>-12</sup>                          | 5.5×10 <sup>-12</sup> | <i>b</i>  |
| 2 | CH <sub>3</sub> CHI + O <sub>2</sub> → CH <sub>3</sub> CHIOO    | 0.7×10 <sup>-12</sup>                          | 1.3×10 <sup>-12</sup> | <i>b</i>  |
| 3 | CH <sub>3</sub> CHI + O <sub>2</sub> → other                    | 1.8×10 <sup>-12</sup>                          | 1.8×10 <sup>-12</sup> | <i>b</i>  |
| 4 | 2 CH <sub>3</sub> CHOO → 2 CH <sub>3</sub> CHO + O <sub>2</sub> |                                                | 1.6×10 <sup>-10</sup> | <i>c</i>  |
| 5 | CH <sub>3</sub> CHIOO + CH <sub>3</sub> CHOO → other            |                                                | 1.0×10 <sup>-10</sup> | <i>d</i>  |
| 6 | CH <sub>3</sub> CHOO + HC(O)OH → HPEF                           | $k^1 = k_3 \times [\text{HC(O)OH}]_0$ , fitted |                       |           |
| 7 | HPEF → FAA                                                      | 1420 s <sup>-1</sup>                           |                       | This work |

<sup>a</sup> Rate coefficient in cm<sup>3</sup> molecule<sup>-1</sup> s<sup>-1</sup>, unless otherwise specified. <sup>b</sup> The total rate coefficient 8.6×10<sup>-12</sup> cm<sup>3</sup> molecule<sup>-1</sup> s<sup>-1</sup> was taken from Howes et al., *Phys. Chem. Chem. Phys.*, 2018, **20**, 22218; a value of 8.0×10<sup>-12</sup> cm<sup>3</sup> molecule<sup>-1</sup> s<sup>-1</sup> was reported by Sheps et al., *Phys. Chem. Chem. Phys.*, 2014, **16**, 26701. The branching of CH<sub>3</sub>CHI + O<sub>2</sub> was based on our unpublished work. <sup>c</sup> From Luo et al. *J. Phys. Chem. Lett.*, 2018, **9**, 4391. <sup>d</sup> Rate coefficient unknown; a rate of 1.0×10<sup>-10</sup> cm<sup>3</sup> molecule<sup>-1</sup> s<sup>-1</sup> similar to CH<sub>2</sub>I<sub>2</sub> + CH<sub>2</sub>OO was assumed.

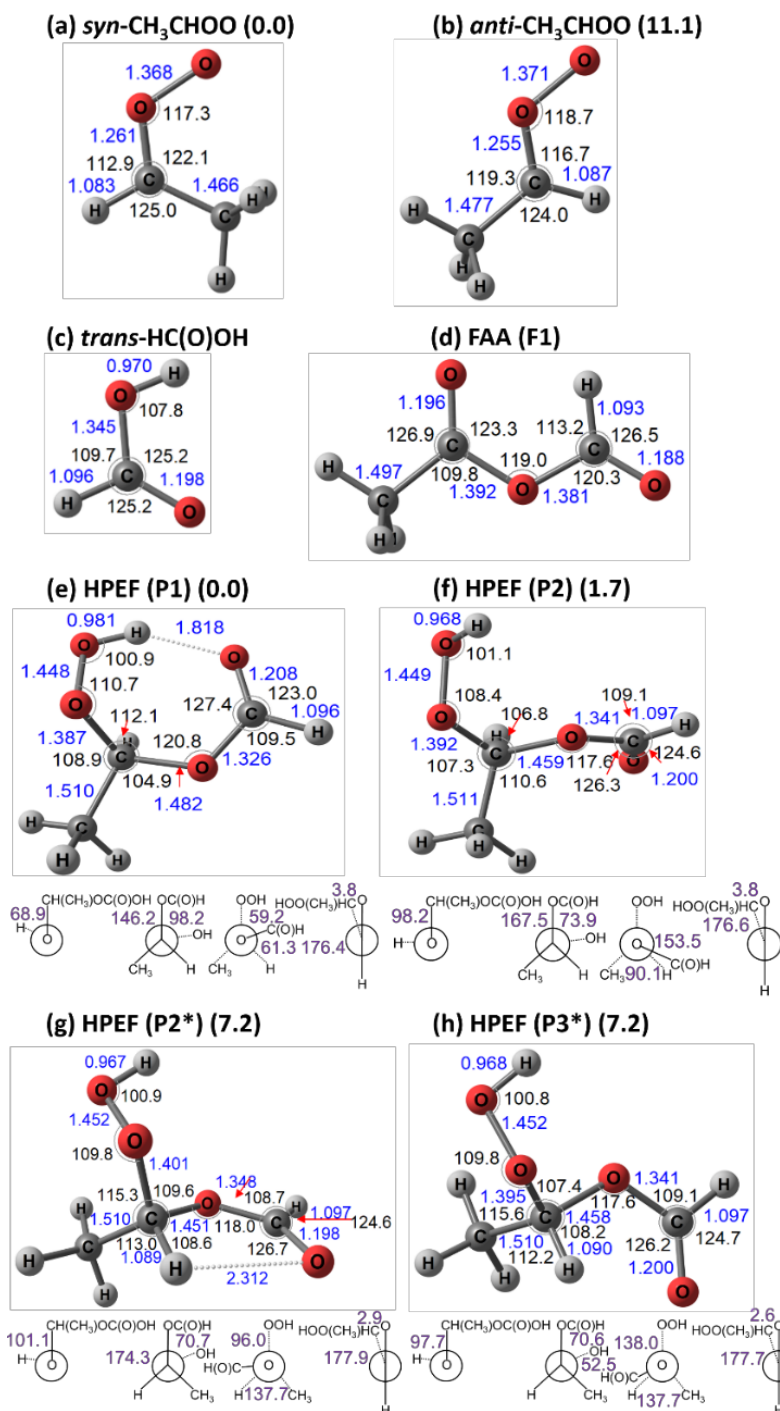

**Fig. S1** Geometries of species observed in this work. (a) *anti*-CH<sub>3</sub>CHOO, (b) *syn*-CH<sub>3</sub>CHOO, (c) *trans*-HC(O)OH, (d) formic acetic anhydride (FAA, F1), (e) hydroperoxyethyl formate (HPEF, P1), (f) HPEF (P2), (g) HPEF (P2\*), and (h) HPEF (P3\*). The structures were computed with the B3LYP/aug-cc-pVTZ method. Relative energies (in kJ mol<sup>-1</sup>) among conformers are listed in parentheses; energies were calculated with the CCSD(T) method at the geometries optimized with the B3LYP/aug-cc-pVTZ method and corrected for vibrational zero-point energy.

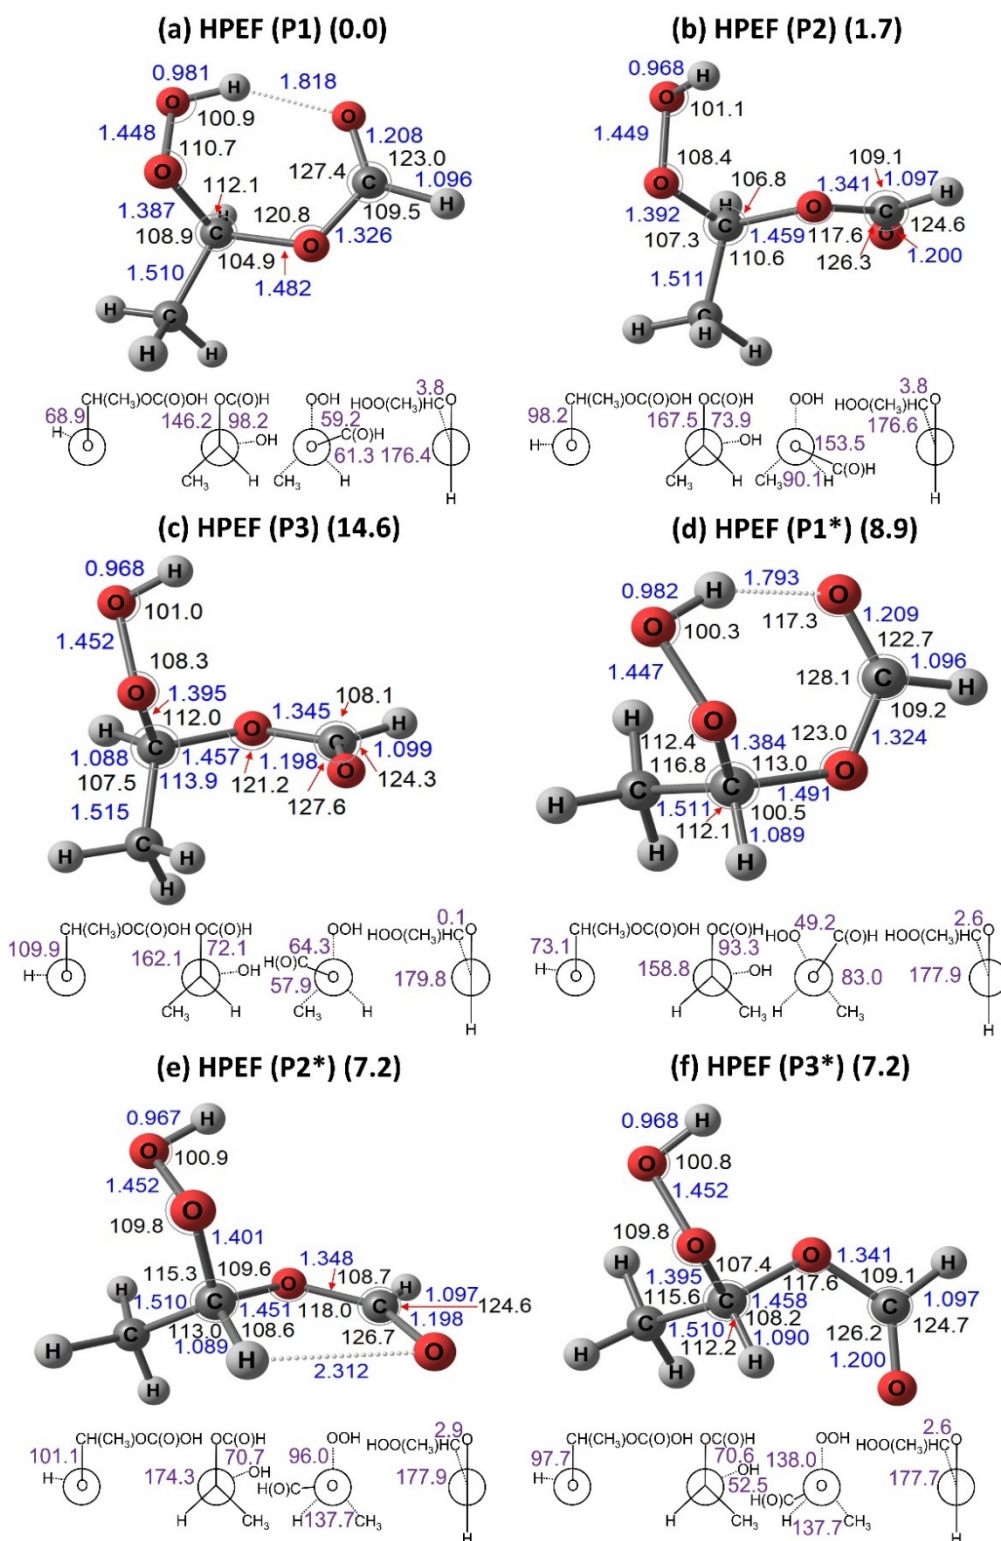

**Fig. S2** Geometries of possible conformers of hydroperoxyethyl formate (HPEF) in the reaction of  $\text{CH}_3\text{CHOO} + \text{HC}(\text{O})\text{OH}$ . Conformers of HPEF: (a) P1, (b) P2, (c) P3, (d) P1\*, (e) P2\*, (f) P3\*. The structures were calculated with the B3LYP/aug-cc-pVTZ method and the energies were calculated with the CCSD(T)/aug-cc-pVTZ//B3LYP/aug-cc-pVTZ method with zero-point vibrational energy at the B3LYP level corrected. Relative energy with respect to the least-energy conformer P1 is presented in parentheses. Bond distances (blue) are in Å and bond angles (in black) are in degree.



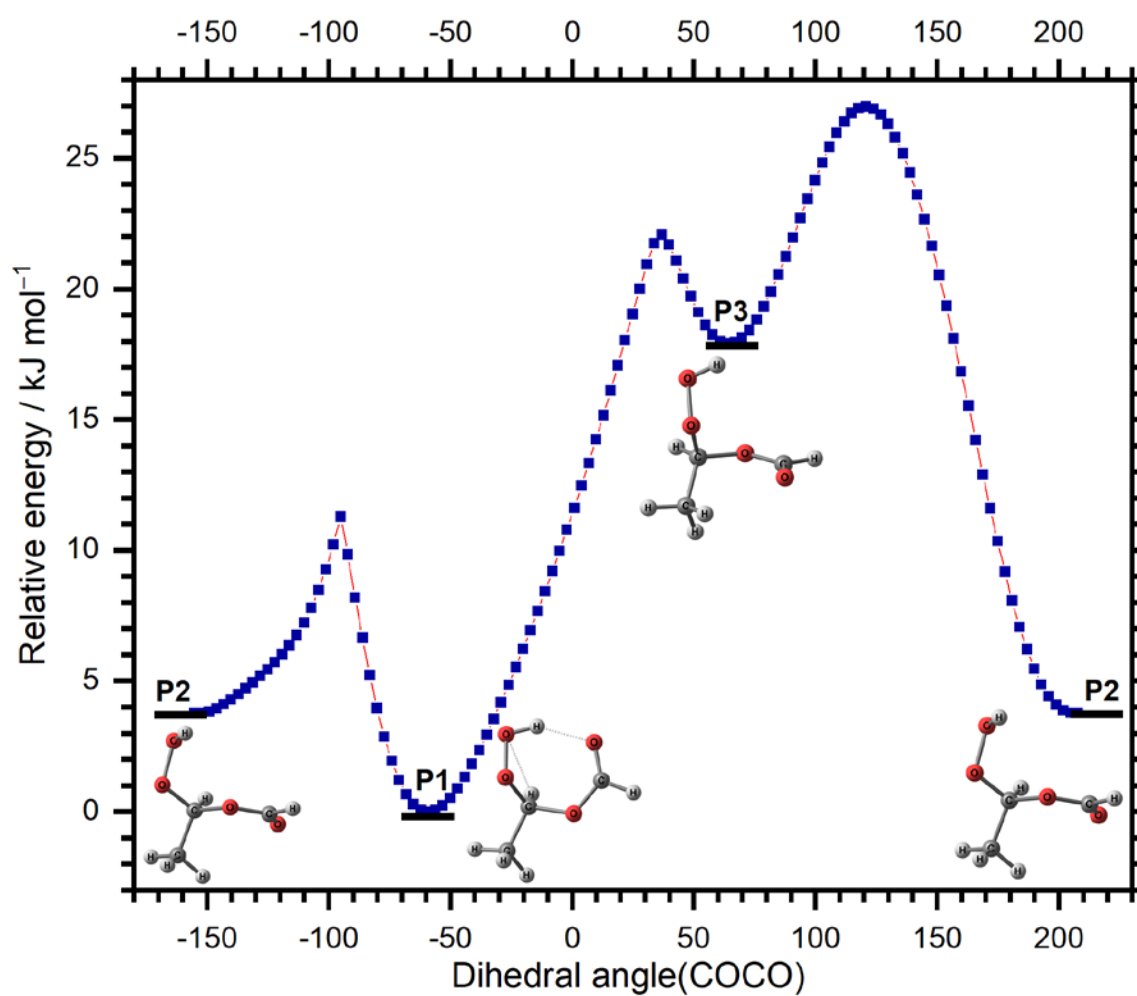

**Fig. S3** Potential-energy curve calculated as a function of the COCO dihedral angle for the interconversion among conformers of HPEF (P1–P3) produced from *anti*- $\text{CH}_3\text{CHOO}$  +  $\text{HC(O)OH}$ . The energies are calculated with the B3LYP/aug-cc-pVTZ methods. The zero energy is set as that of the most stable conformer P1.

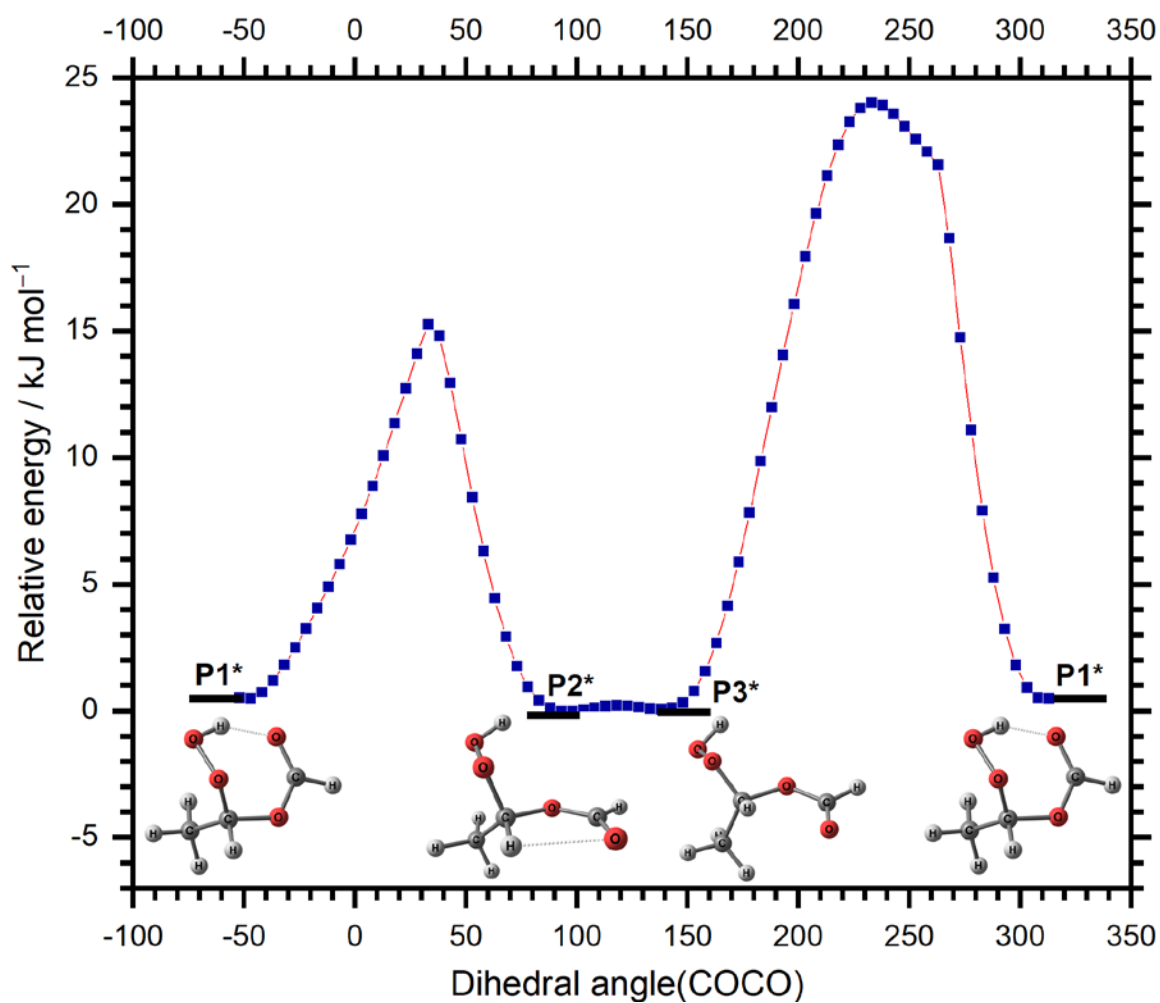

**Fig. S4** Potential-energy curve calculated as a function of the COCO dihedral angle for the interconversion among conformers of HPEF (P1\*–P3\*) produced from *syn*-CH<sub>3</sub>CHOO + HC(O)OH. The energies are calculated with the B3LYP/aug-cc-pVTZ methods. The zero energy is set as that of the most stable conformer P2\*.

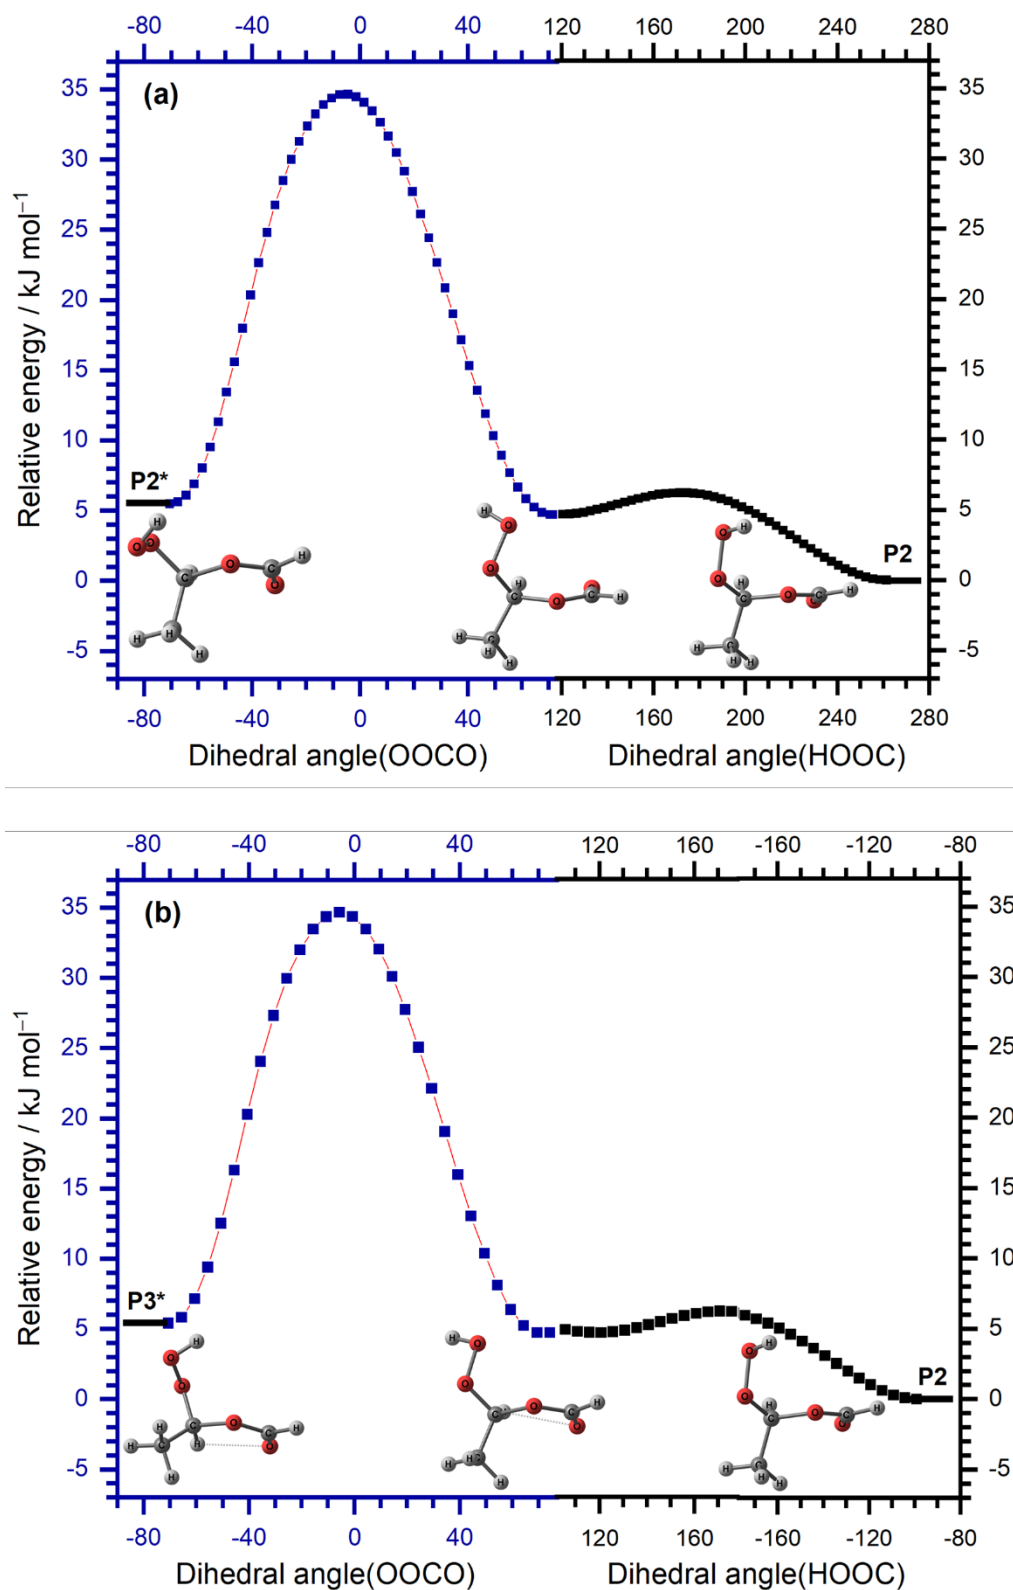

**Fig. S5** Potential-energy curves calculated for the interconversion HPEF conformers between P2\*/P3\* and P2. (a) P2\* to P2, and (b) P3\* to P2. We connected two scans to present the interconversion in the same figure. The scan for OOCO, and HOOC dihedral angles is presented in blue, and black color, respectively. The energies are calculated with the B3LYP/aug-cc-pVTZ methods. The least energy conformer P2 energy is set as zero.

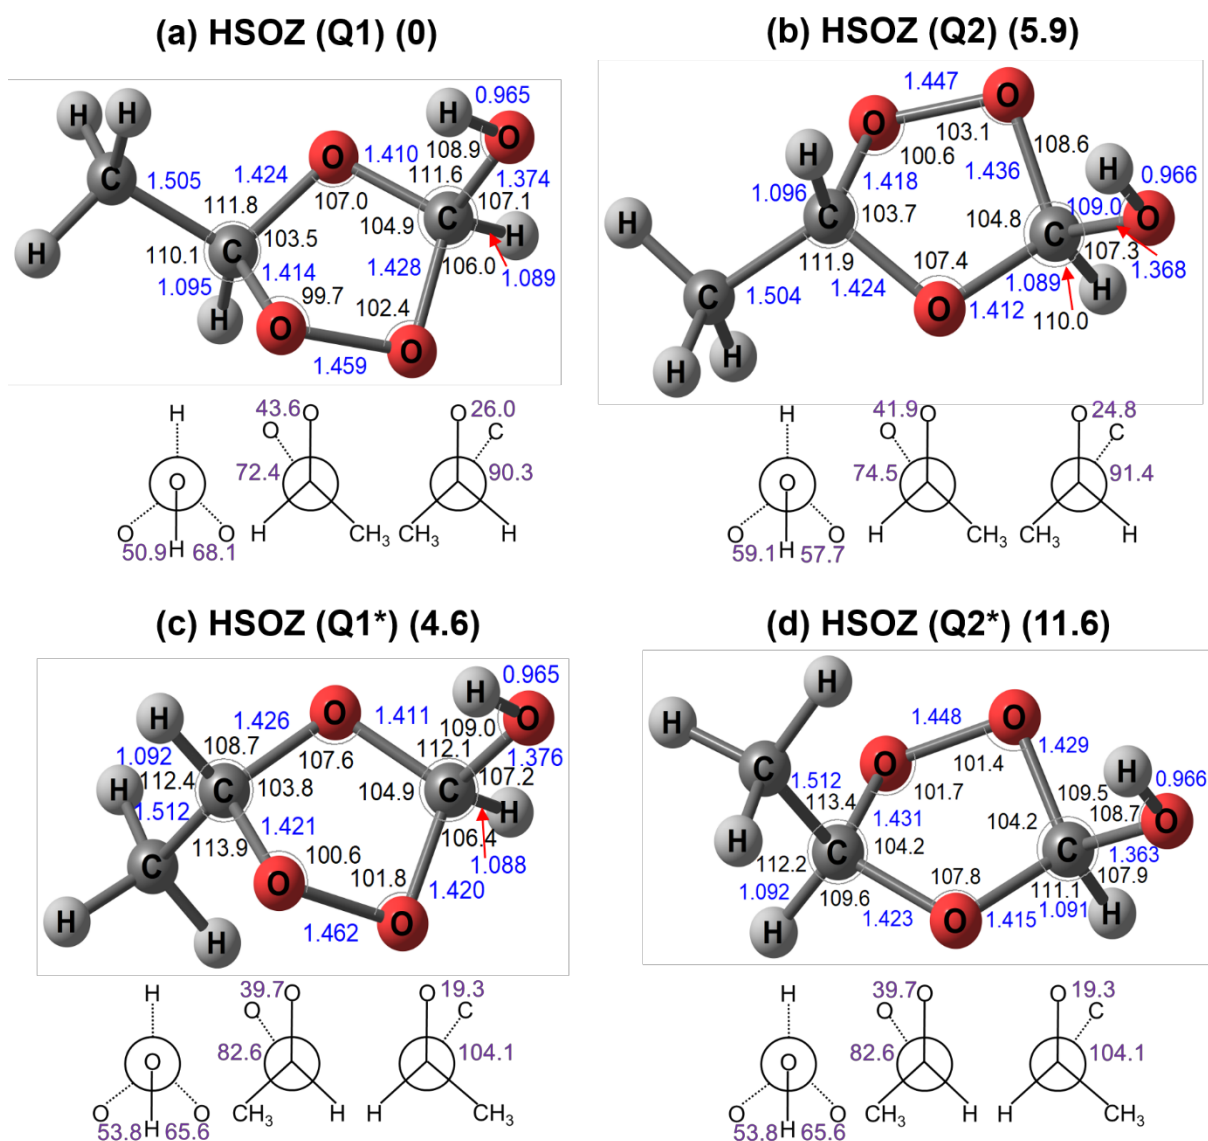

**Fig. S6** Geometries of possible conformers of hydroxylated secondary ozonide (HSOZ) produced in the reaction of  $\text{CH}_3\text{CHOO} + \text{HC(O)OH}$ . Conformers of HSOZ: (a) Q1, (b) Q2, (c) Q1\*, and (d) Q2\*. The structures were calculated with the B3LYP/aug-cc-pVTZ method and the energies were calculated with the CCSD(T)/aug-cc-pVTZ//B3LYP/aug-cc-pVTZ method with zero-point vibrational energy at the B3LYP level corrected. Relative energy with respect to the least-energy conformer Q1 is presented in parentheses. Bond distances (blue) are in Å and bond angles (in black) are in degree.

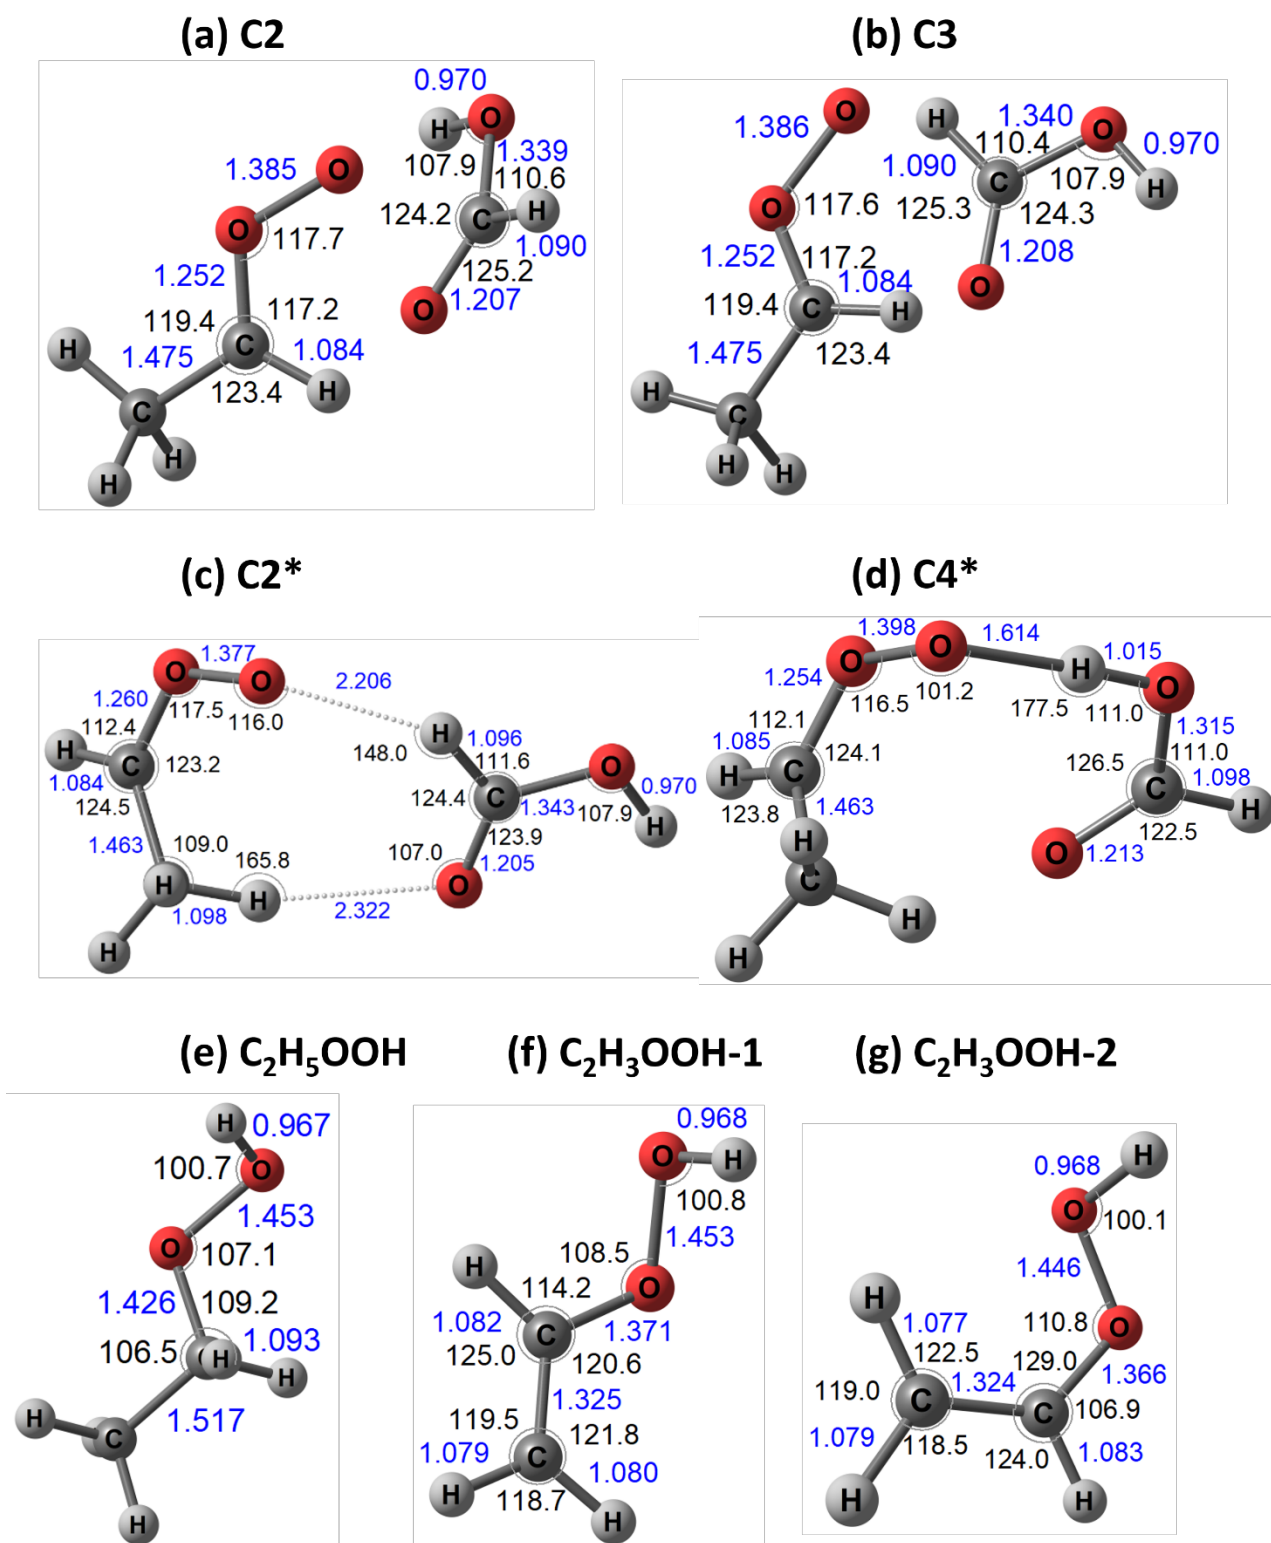

**Fig. S7** Geometries of pre-reactive complexes and products other than dehydrated products in the reaction of  $\text{CH}_3\text{CHOO} + \text{HC}(\text{O})\text{OH}$ . Complexes and products: (a) C2, (b) C3, (c) C2\*, (d) C4\*, (e) C<sub>2</sub>H<sub>5</sub>OH, (f) C<sub>2</sub>H<sub>3</sub>OOH-1, and (d) C<sub>2</sub>H<sub>3</sub>OOH-2. The structures were calculated with the B3LYP/aug-cc-pVTZ method. Bond distances (blue) are in Å and bond angles (in black) are in degrees.

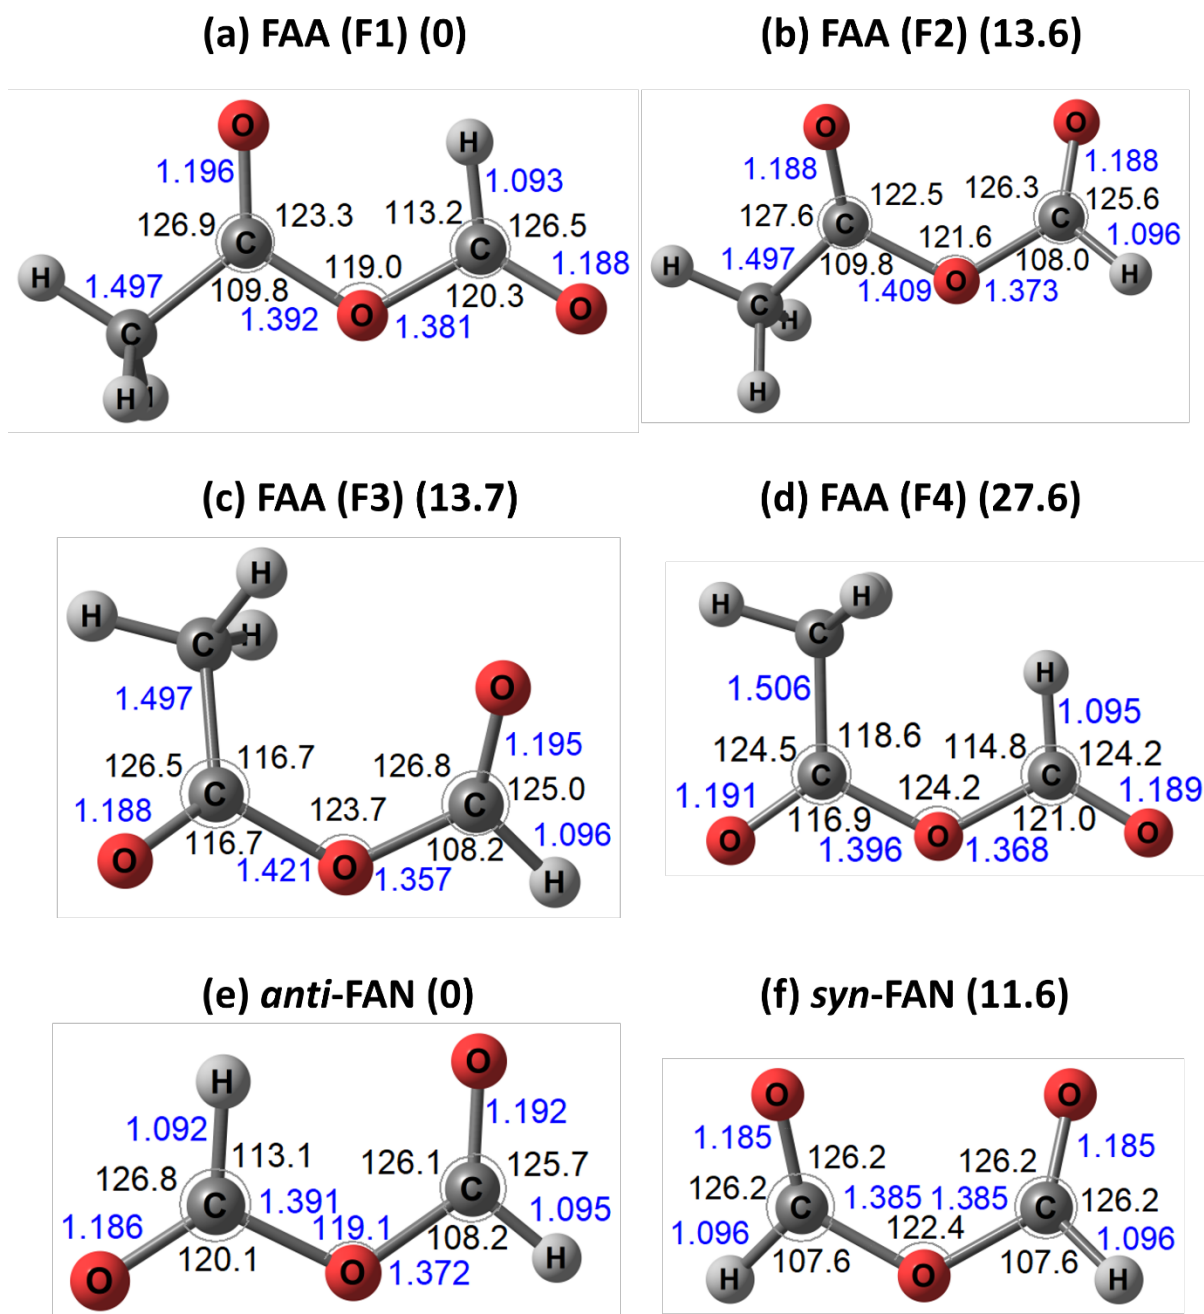

**Fig. S8** Geometries of conformers of formic acetic anhydride (FAA) and formic anhydride (FAN) produced in the reaction of  $\text{CH}_3\text{CHOO} + \text{HC}(\text{O})\text{OH}$ . Conformers of FAA: (a) F1, (b) F2, (c) F3, and (d) F4. Conformers of FAN: (e) *anti*-FAN, and (f) *syn*-FAN. The structures were calculated with the B3LYP/aug-cc-pVTZ method and the energies were calculated with the CCSD(T)/aug-cc-pVTZ//B3LYP/aug-cc-pVTZ method with zero-point vibrational energy at the B3LYP level corrected. Relative energy with respect to the least-energy conformer is presented in parentheses. Bond distances (blue) are in Å and bond angles (in black) are in degree.

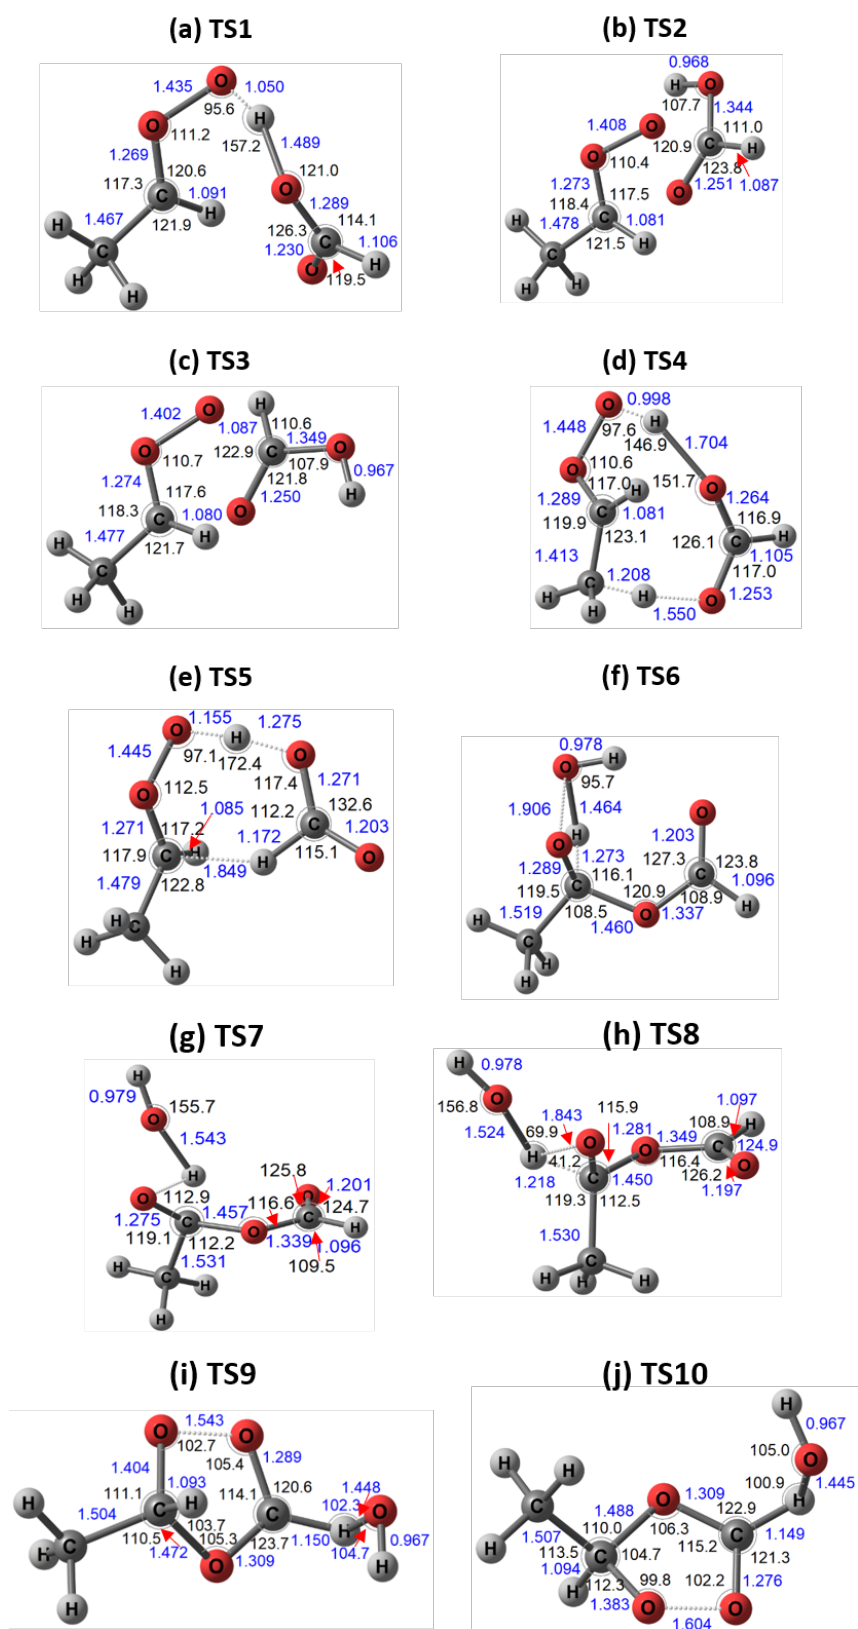

**Fig. S9** Geometries of transition states in the reaction of *anti*-CH<sub>3</sub>CHOO + HC(O)OH. The structures were calculated with the B3LYP/aug-cc-pVTZ method. Bond distances (blue) are in Å and bond angles (in black) are in degree.



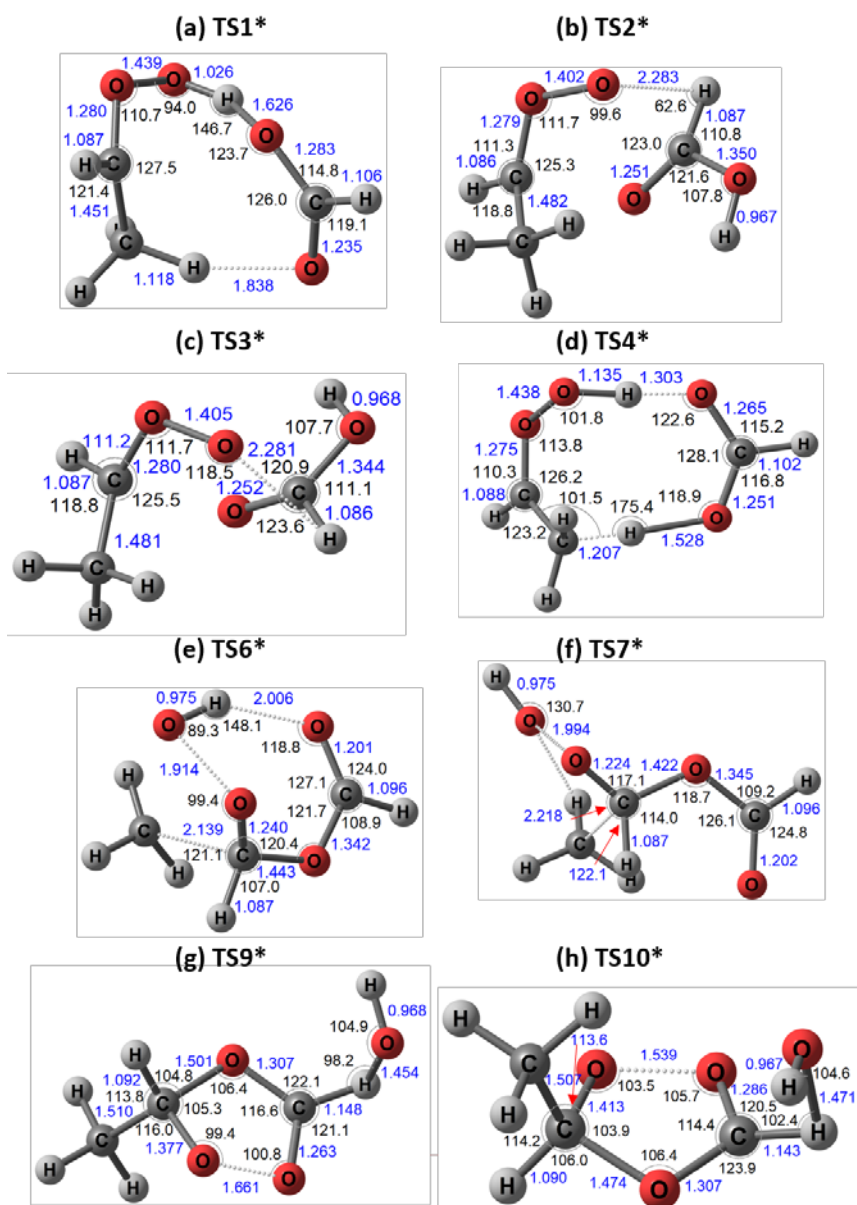

**Fig. S10** Geometries of transition states in the reaction of *syn*-CH<sub>3</sub>CHOO + HC(O)OH. The structures were calculated with the B3LYP/aug-cc-pVTZ method. Bond distances (blue) are in Å and bond angles (in black) are in degree.



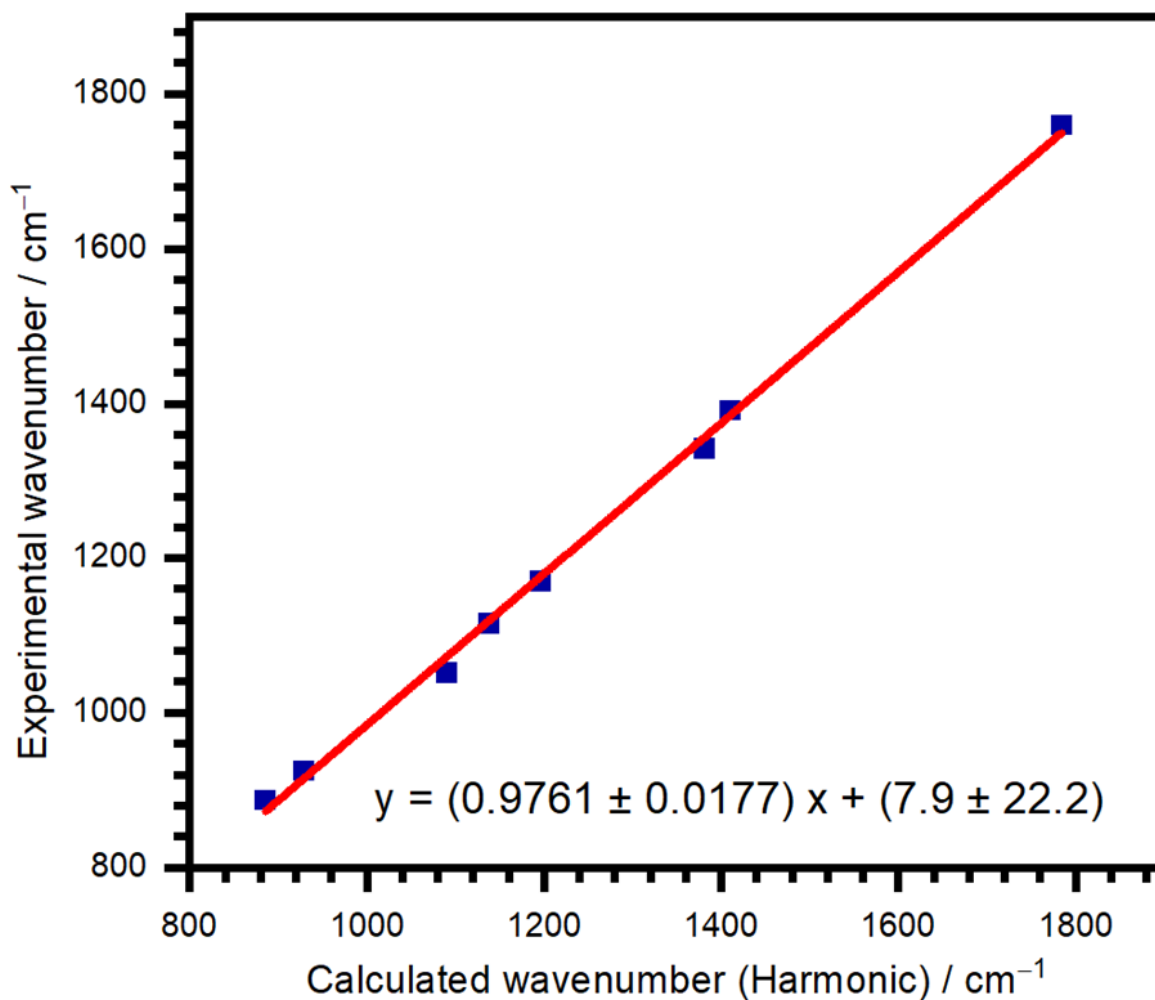

**Fig. S11** Linear fit of experimental wavenumbers vs. calculated harmonic vibrational wavenumbers of hydroperoxymethyl formate (HPMF). Data taken from C.-A. Chung, J. W. Su and Y.-P. Lee, *Phys. Chem. Chem. Phys.*, 2019, **21**, 21445. The linear equation obtained on fitting the data is  $y = (0.9761 \pm 0.0177) x + (7.9 \pm 22.2)$ ;  $y$  is the scaled wavenumber and  $x$  is the calculated harmonic vibrational wavenumber.

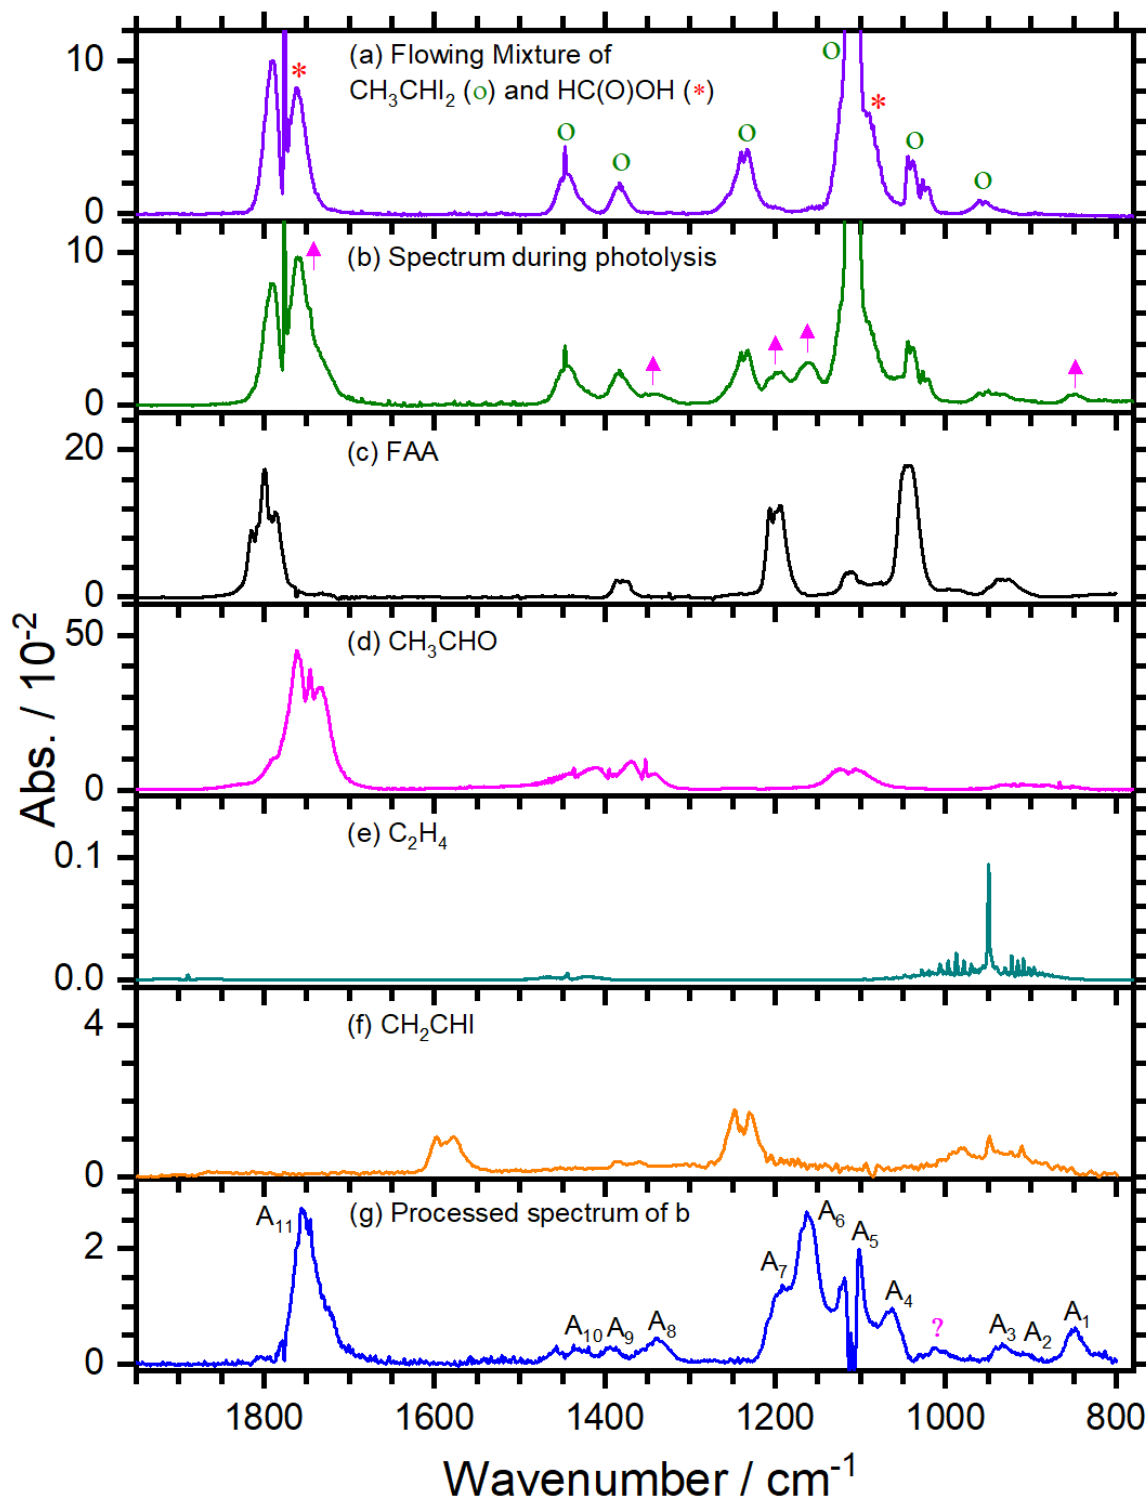

**Fig. S12** Observed spectra in region 770–1950  $\text{cm}^{-1}$  during photolysis at 308 nm (5 Hz, 180  $\text{mJ pulse}^{-1}$ ) of a flowing mixture of  $\text{CH}_3\text{CHI}_2/\text{O}_2/\text{HC(O)OH}$  (0.064/53.9/0.020,  $P_T = 54.0$  torr) recorded with continuous scan. (a) Spectrum before photolysis. Features of  $\text{CH}_3\text{CHI}_2$  and  $\text{HC(O)OH}$  are denoted with green circles and red asterisks, respectively. (b) Spectrum during photolysis. New features are indicated by pink arrows. Reference spectra of formic acetic anhydride FAA (c),  $\text{CH}_3\text{CHO}$  (d),  $\text{C}_2\text{H}_4$  (e), and  $\text{CH}_2\text{CHI}$  (f). (g) Processed spectra in (b), with feature of  $\text{HC(O)OH}$ ,  $\text{CH}_3\text{CHI}_2$ , FAA,  $\text{CH}_3\text{CHO}$ ,  $\text{C}_2\text{H}_4$ , and  $\text{CH}_2\text{CHI}$  removed. Features in group A are indicated. The instrumental resolution is  $1 \text{ cm}^{-1}$ .

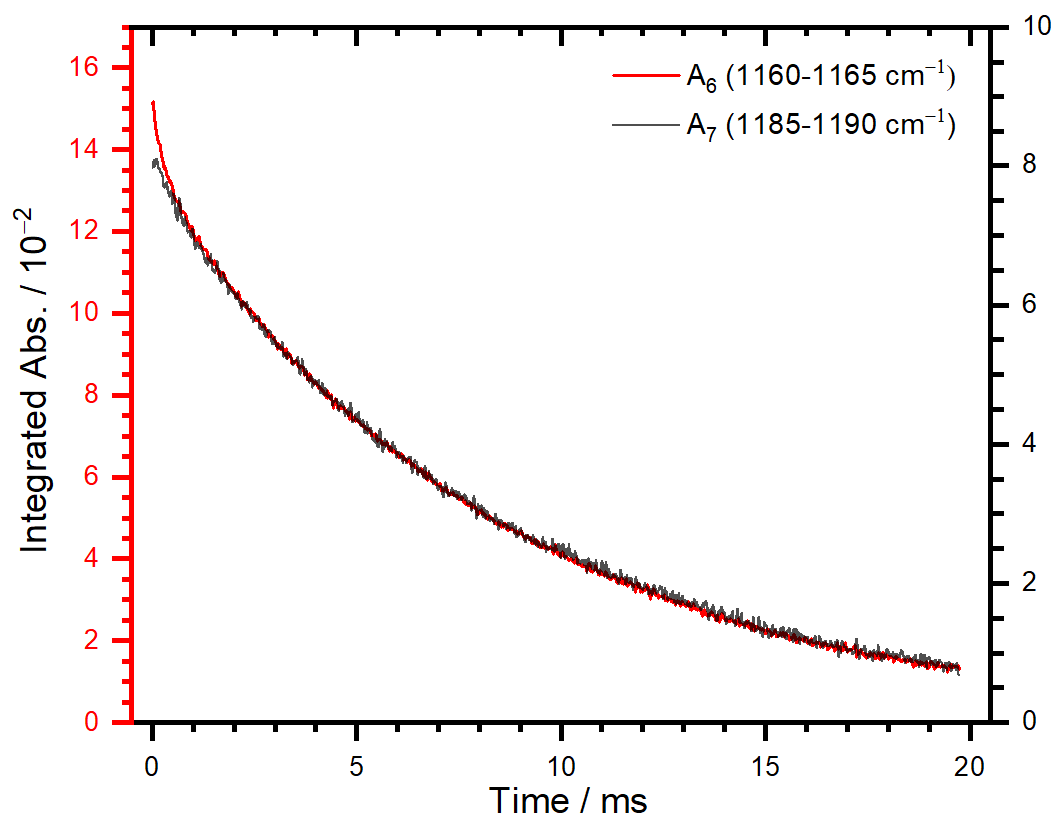

**Fig. S13** Comparison of temporal evolution of bands A<sub>6</sub> and A<sub>7</sub>. The traces of bands A<sub>6</sub> (red), and A<sub>7</sub> (black) were obtained on integrating over the regions 1160–1165 and 1185–1190 cm<sup>-1</sup>, respectively. The left ordinate and right ordinate are for bands A<sub>6</sub> and A<sub>7</sub>, respectively.

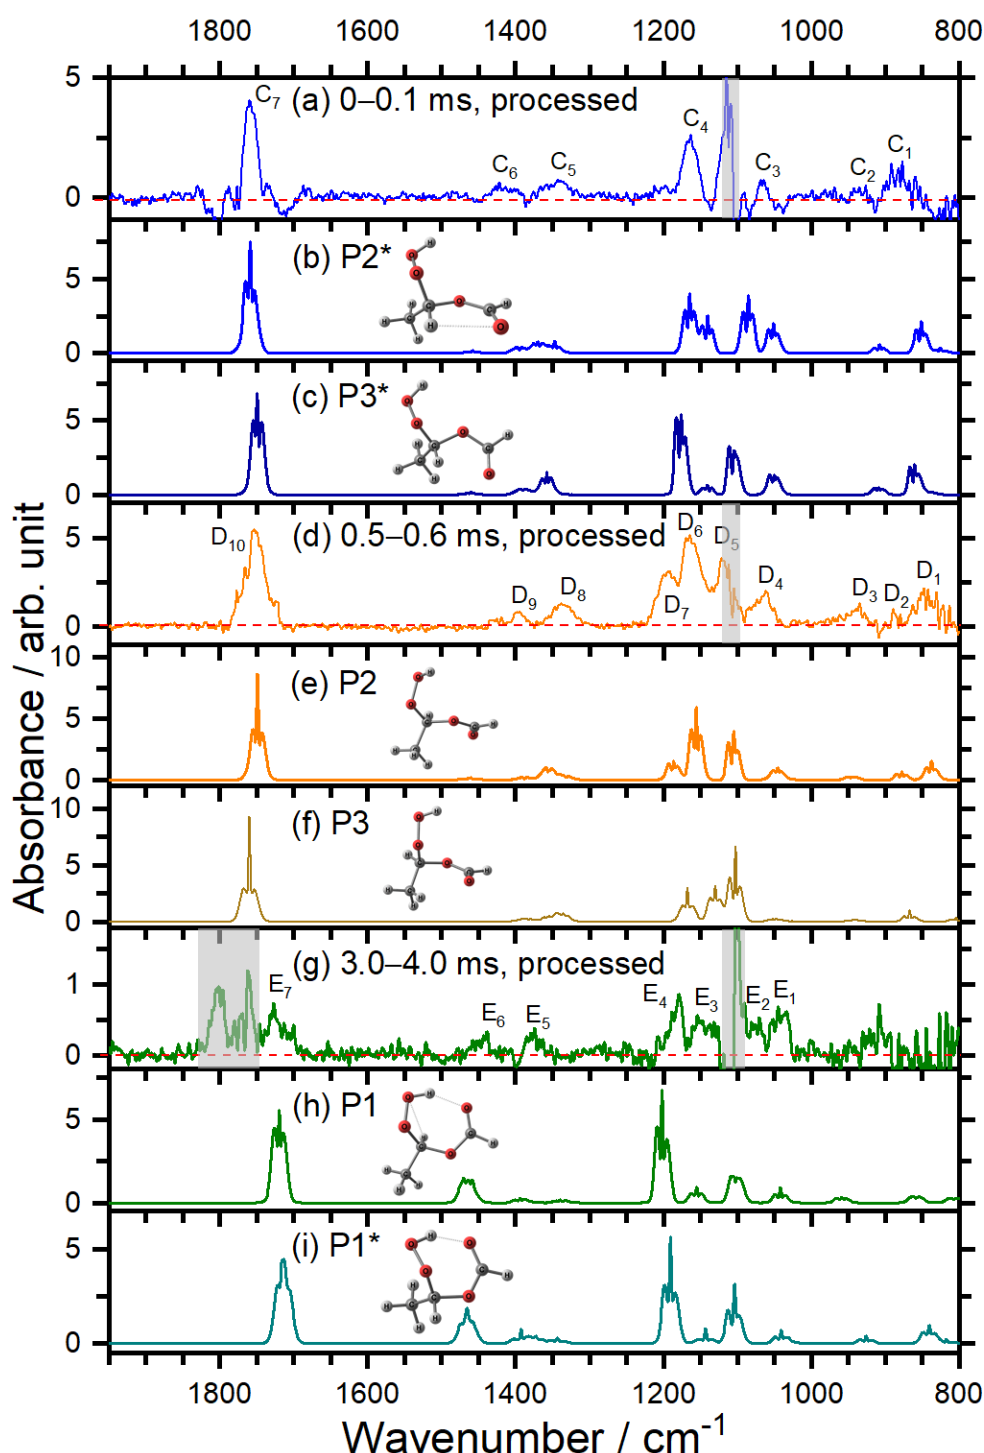

**Fig. S14** Comparison of observed spectra in groups C, D, and E with simulated IR spectra of conformers of HPEF. (a) Processed spectrum of group C, reproduced from Fig. 8e. Simulated IR spectra of HPEF (P2\*) (b) and HPEF (P3\*) (c). (d) Processed spectrum of group D, reproduced from Fig. 8f. Simulated IR spectra of HPEF (P2) (e) and HPEF (P3) (f). (g) Processed spectrum of group E, reproduced from Fig. 8g. Simulated IR spectra of HPEF (P1) (h) and HPEF (P1\*) (i). Spectra were simulated according to scaled vibrational wavenumbers, harmonic IR intensities, rotational parameters, and type ratios predicted with the B3LYP/aug-cc-pVTZ method. The regions of interference from absorption of  $\text{CH}_3\text{CHI}_2$  and  $\text{HC(O)OH}$  are shaded gray. The instrumental resolution is  $2\text{ cm}^{-1}$ .

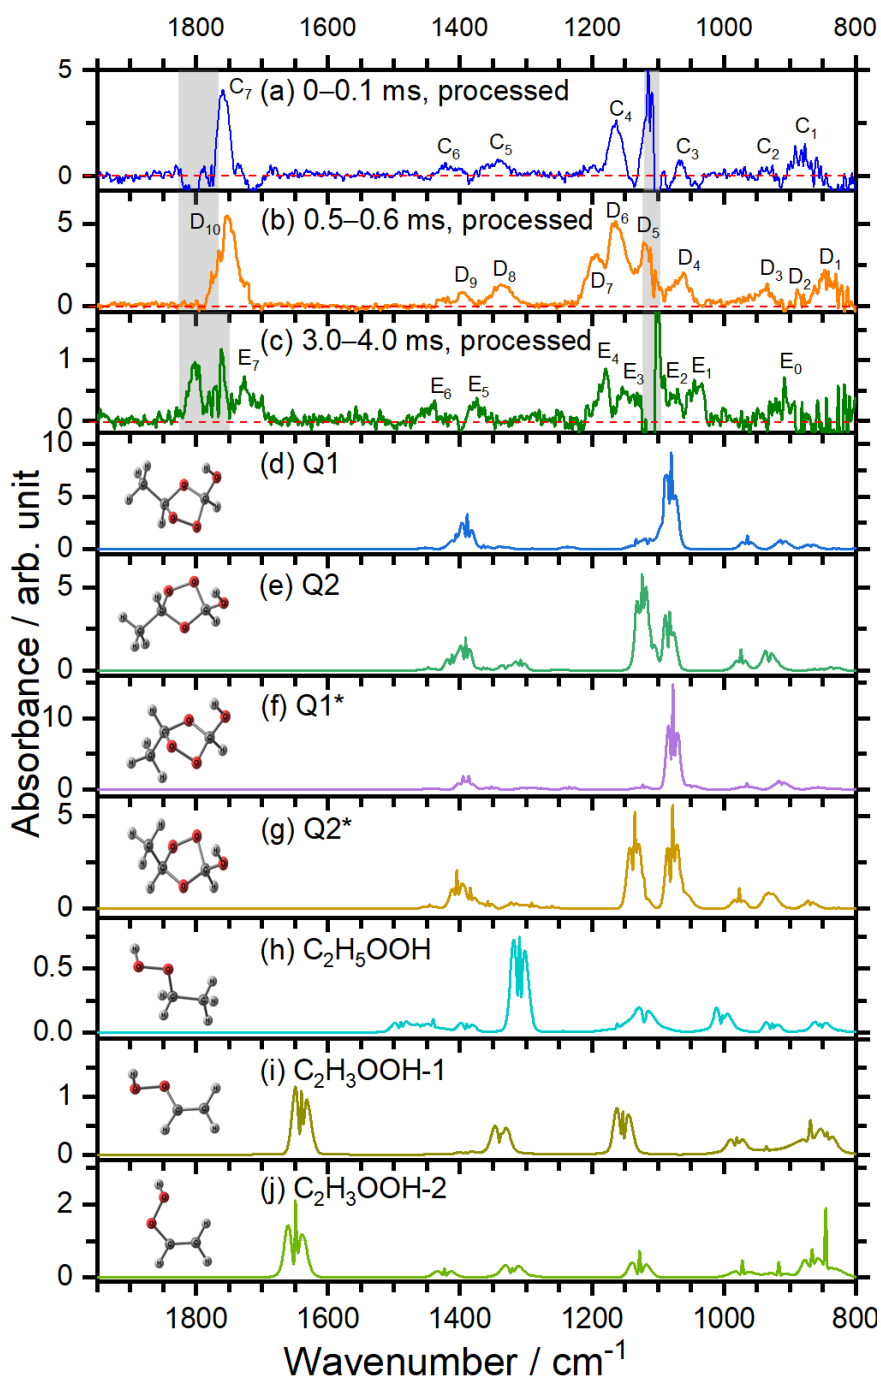

**Fig. S15** Comparison of the observed spectra in groups C, D, and E with simulated IR spectra of conformers of HSOZ (Q1, Q2, Q1\*, and Q2\*), C<sub>2</sub>H<sub>5</sub>OOH, C<sub>2</sub>H<sub>3</sub>OOH-1, and C<sub>2</sub>H<sub>3</sub>OOH-2. (a) Processed spectrum of group C, reproduced from Fig. 8e. (b) Processed spectrum of group D, reproduced from Fig. 8f. (c) Processed spectrum of group E, reproduced from Fig. 8g. (d)–(j) Simulated IR spectra of HSOZ (Q1), HSOZ (Q2), HSOZ (Q1\*), HSOZ (Q2\*), C<sub>2</sub>H<sub>5</sub>OOH, C<sub>2</sub>H<sub>3</sub>OOH-1, and C<sub>2</sub>H<sub>3</sub>OOH-2 according to anharmonic vibrational wavenumbers and harmonic IR intensities predicted with the B3LYP/aug-cc-pVTZ method. The regions of interference from absorption of CH<sub>3</sub>CHI<sub>2</sub> and HC(O)OH are shaded gray. The instrumental resolution is 2 cm<sup>-1</sup>.

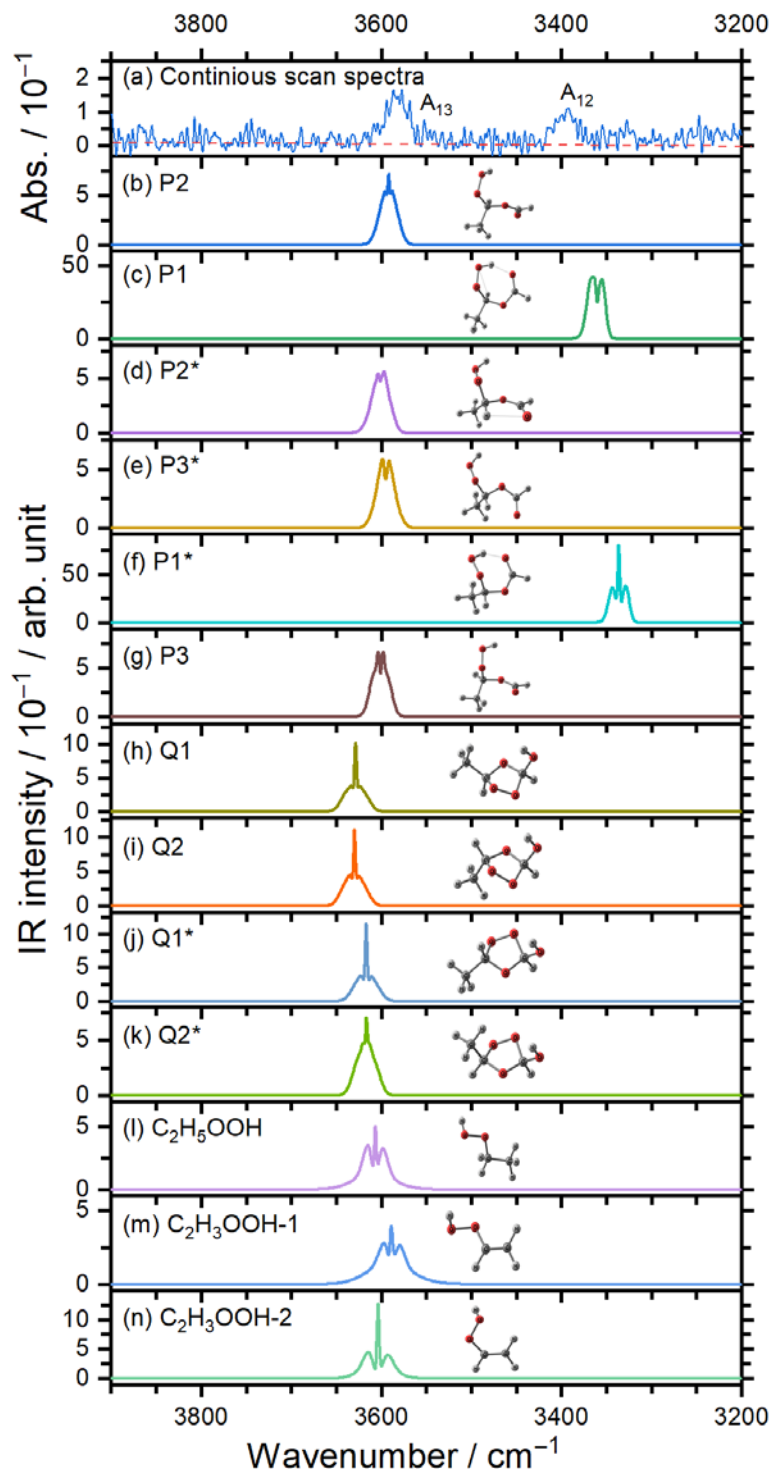

**Fig. S16** Comparison of bands A12 and A13 observed in region 3200–3900  $\text{cm}^{-1}$  with simulated IR spectra of possible conformers of HPEF (P1–P3, P1\*–P3\*), HSOZ (Q1–Q2, Q1\*–Q2\*),  $\text{C}_2\text{H}_5\text{OOH}$ ,  $\text{C}_2\text{H}_3\text{OOH-1}$ , and  $\text{C}_2\text{H}_3\text{OOH-2}$ . (a) Flow cell experiment spectra reproduced from Fig. 6c. Simulated IR spectra of (b) HPEF (P2), (c) HPEF (P1), (d) HPEF (P2\*), (e) HPEF (P3\*), (f) HPEF (P1\*), (g) HPEF (P3), (h) HSOZ (Q1), (i) HSOZ (Q2), (j) HSOZ (Q1\*), (k) HSOZ (Q2\*), (l)  $\text{C}_2\text{H}_5\text{OOH}$ , (m)  $\text{C}_2\text{H}_3\text{OOH-1}$ , and (n)  $\text{C}_2\text{H}_3\text{OOH-2}$  according to scaled harmonic vibrational wavenumbers and harmonic IR intensities predicted with the B3LYP/aug-cc-pVTZ method. The instrumental resolution is  $2 \text{ cm}^{-1}$ .

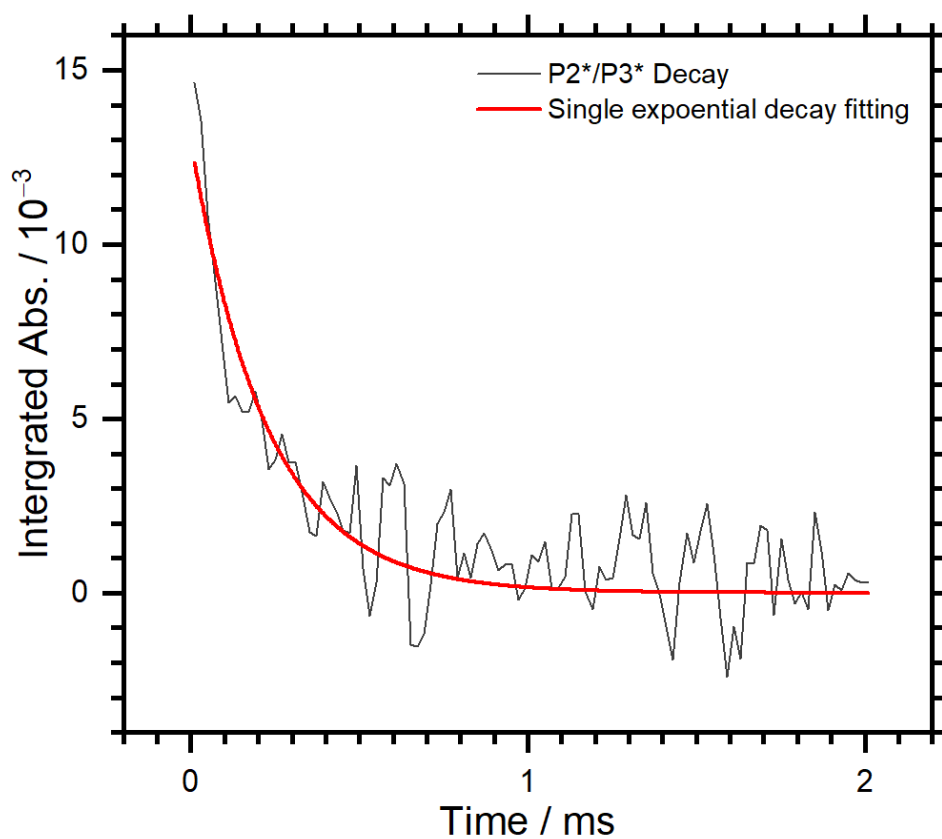

**Fig. S17** Exponential fit of the decay of P2\*/P3\*. The temporal profile was obtained on subtracting 1.73 times the integrated absorbance of band A<sub>7</sub> (integrated over 1180–1210 cm<sup>-1</sup>) from that of band A<sub>6</sub> (integrated over 1150–1175 cm<sup>-1</sup>). The red line represents a single exponential fit with a decay rate coefficient (4430 ± 390) s<sup>-1</sup>.

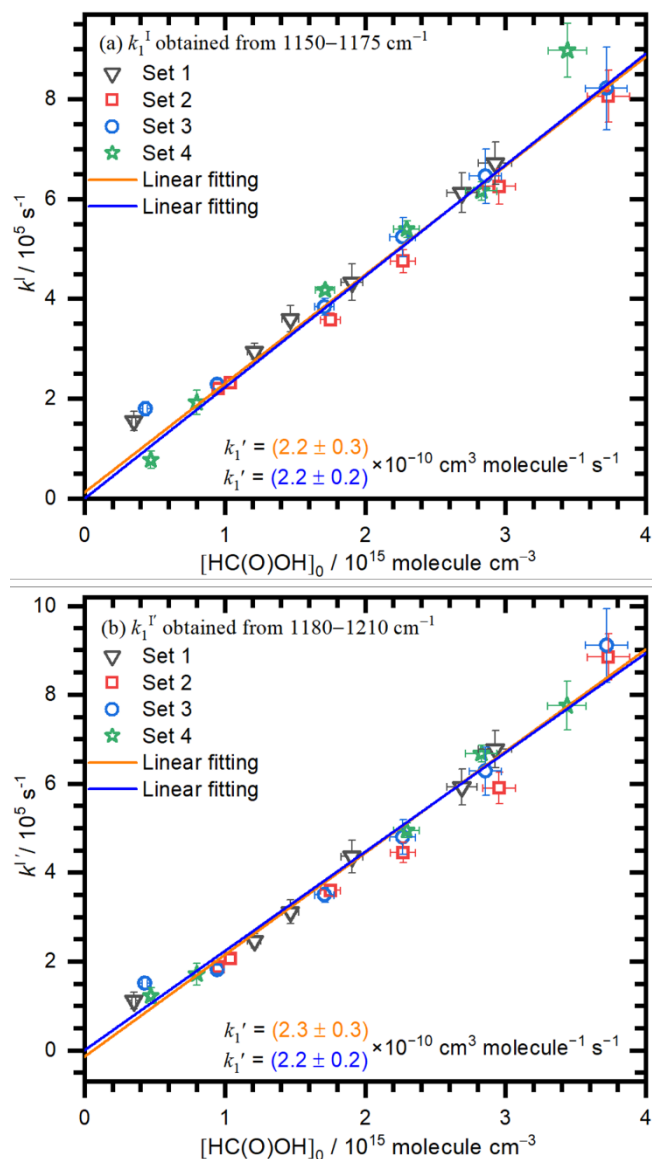

**Fig. S18** Fitted first-order rate coefficients  $k_1^I(A_6)$  and  $k_1^I(A_7)$  as a function of  $[\text{HC(O)OH}]_0$ . (a)  $k_1^I(A_6)$  and (b)  $k_1^I(A_7)$  derived from the single exponential-rise fitting for the reaction  $\text{CH}_3\text{CHOO} + \text{HC(O)OH} \rightarrow \text{HPEF}$ . Bands  $A_6$  and  $A_7$  were integrated over regions 1150–1175  $\text{cm}^{-1}$  and 1180–1210  $\text{cm}^{-1}$ , respectively. The orange line represents a linear fit to  $y = ax + b$  and the slope represents bimolecular rate coefficient  $k_1$ ;  $k_1'(A_6) = (2.2 \pm 0.3) \times 10^{-10}$  and  $k_1(A_7) = (2.3 \pm 0.3) \times 10^{-10} \text{ cm}^3 \text{ molecule}^{-1} \text{ s}^{-1}$ . The blue line represents a linear fit to  $y = ax$ ;  $k_1'(A_6) = (2.2 \pm 0.2) \times 10^{-10}$  and  $k_1(A_7) = (2.2 \pm 0.2) \times 10^{-10} \text{ cm}^3 \text{ molecule}^{-1} \text{ s}^{-1}$ .



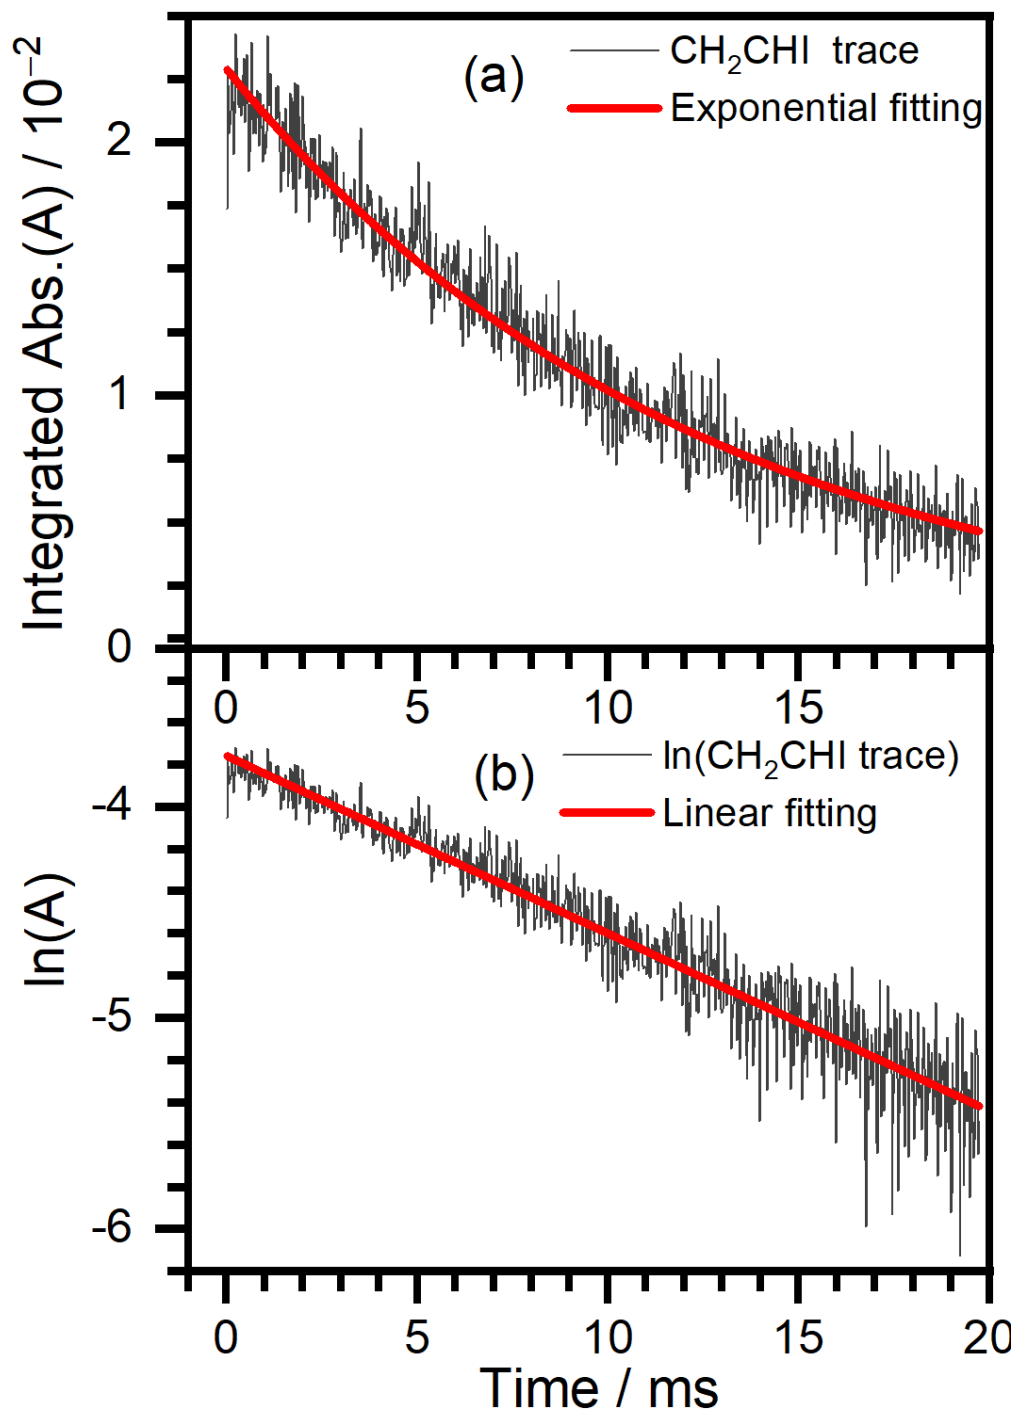

**Fig. S19** Temporal profiles for the decay of CH<sub>2</sub>CHI due to pumping. The solid red lines represent fitted temporal profiles. The data was obtained on integrating over the region 1585–1610 cm<sup>-1</sup> at temporal resolution 20 μs. (a) Integrated absorbance A of CH<sub>2</sub>CHI and the single exponential fitting, (b) semi-logarithmic plot of integrated absorbance A of CH<sub>2</sub>CHI vs. time and the linear fitting.

## References

---

- <sup>1</sup> N. U. M. Howes, Z. S. Mir, M. A. Blitz, S. Hardman, T. R. Lewis, D. Stone and P. W. Seakins, *Phys. Chem. Chem. Phys.*, 2018, **20**, 22218
- <sup>2</sup> L. Sheps, A. M. Scully and K. Au, *Phys. Chem. Chem. Phys.*, 2014, **16**, 26701
- <sup>3</sup> W.-L. Ting, C.-H. Chang, Y.-F. Lee, H. Matsui, Y.-P. Lee and J. J.-M. Lin, *J. Chem. Phys.*, 2014, **141**, 104308.
- <sup>4</sup> T. Gravestock, M. Blitz, W. Bloss and D. E. Heard, *ChemPhysChem*, 2010, **11**, 3928.
